# Supplementary material for: Gene Expression as a Guide to the Development of Novel Therapies in Primary Glomerular Diseases
Source: MDPI journal article supplement (doi:10.3390/jcm10112262), 2021-05-24
Supplement: s1 [file s1]

## Sheet: Supplementary Table 1
Disease or Condition	Total number	Reference	Age (years)	Gender (M/F in %)	eGFR (ml/min/1.73m2)	Serum creatinine (μmol/L)
Healthy*	36
		Ref[20]	35±23.6	44/56	N/A	N/A
		Ref[21]	N/A	N/A	N/A	N/A
		Ref[22]	48.5 (32-62)	50/50	N/A	<120
FSGS	39
		Ref[20]	42.9±19.6	63/37	N/A	N/A
		Ref[21]	44.6±15.8	53/47	N/A	N/A
MCD	21
		Ref[20]	41.4±17.6	43/57	N/A	N/A
		Ref[21]	37.4±17.7	58/42	N/A	N/A
MN	21
		Ref[21]	53.7±18.0	57/43	84.8±40.1	N/A
IgAN	54
		Ref[21]	36.4±14.1	73/27	73.9±37.0	N/A
		Ref[22]	36 (19-84)	71/29	N/A	131±129
TBMN	3	Ref[21]	N/A	N/A	N/A	N/A
N/A = NOT AVAILABLE
Age is presented in years as mean±standard deviation or median (min-max)
* Control kidneys correspond to healthy kidney areas next to kidney cancer and kidney samples from patients with minimal isolated proteinuria or hematuria or from living kidney donors.

## Sheet: Supplementary Table 2
FSGS-specific DEGs	MCD-specific DEGs	IgAN-specific DEGs	MN-specific DEGs	TBMN-specific DEGs
U2AF1	STRA6	IRAK1	PCDH12	SAA4
PPP1R1A	BHMT	EFNB1	SAMD4A	PPP4C
RELN	ALDOB	ZNF250	HEXIM1	THG1L
DAZAP1	FTCD	GIT2	B4GALT7	HCFC1R1
KRT7	ABP1	PTHLH	LRPAP1	LRP8
NR2F2	SLC13A3	SENP5	C20orf3	HDAC5
C20orf43	SOHLH2	CYBA	COMMD9	PTX3
AGR2	ALDH1A3	NR1H3	BID	RING1
HMOX1	TM4SF5	SMARCAL1	TTC39A	KRI1
CLDN1	AKR7A3	F8	IGF2BP3	KLHL25
HBEGF	APOM	PBK	PMP22	LRP2BP
HOXC10	IQCA1	GALNT1	FAM131A	LDOC1
SORL1	CMKLR1	CD302	SRM	TNFRSF10B
CENPF	NFE2L3	FAM64A	GJA5	CFLAR
VRK3	XPNPEP2	HLA-A	RCBTB2	HOMER2
ECT2	ADAM23	TBC1D22A	PARD3	NOC4L
KIAA0040	GSTA1	DCK	MRPL11	POLRMT
PPPDE2	PSAT1	NUP107	CSRP2	ATP13A1
MMP7	CCBP2	MRTO4	IMPDH1	RNF40
MRE11A	SLC22A11	SEC24D	PGS1	OTUB1
NT5E	SLC5A2	RPN2	USP3	COL7A1
NDUFB6	SLC4A4	DAP3	IFNG	RHOD
KCNK3	KCNJ16	LMNB2	C12orf48	HNF1B
CCND2	MYST1	RAP1GDS1	EIF3K	AVPR2
BFSP1	ECHDC3	ITPR3	PTN	CARS
LPP	DPEP1	GM2A	TMEM147	BLOC1S1
NMU	HBE1	CDKN3	LILRB2	CITED1
PCGF2	LETM1	ELMO1	EFNB3	ELL3
COL5A1	LIPF	SH3GL1	ESYT1	NTHL1
IL15RA	GCAT	STIL	FBXW2	CTDSP2
CD9	AZGP1	NXF1	PTPRE	ZC3H3
ASPHD1	TEAD1	TNIP1	GAS2	DDX56
UBE2D3	ZNF839	DHRS9	GARS	CXCR1
GATAD2A	A2BP1	GSDMD	BET1	ZNF767
DAAM1	LPPR1	RTP4	KIN	IRF1
SRGN	CRYL1	C19orf66	TSTA3	ABLIM3
FBXO28	PDZK1	THOC5	UROD	PDLIM1
PPAN	ASB4	PAFAH1B3	ARAP3	HTR2B
RTCD1	SH3GL2	CDK5	KIFC3	RFX1
FLNB	UBOX5	CPVL	SLC48A1	CSTA
UTP18	GLYAT	CNPY3	LAMC1	TUBB3
PLAU	PCSK1N	ENSA	SLC37A1	TMEM161A
C12orf49	C11orf71	RPL39L	HS3ST3A1	LRDD
KRT18	GAD1	SAP30BP	EXOSC9	MED8
SMARCA4	GLDC	ARRB2	ARHGAP28	PAK1IP1
CAV1	CXCL14	E2F3	SLFN12	TBL3
RAP2A	HAO2	GPR107	TRAPPC2	CPT1B
NADSYN1	RAB6A	ITGA7	MGP	PSMD3
CDH6	CPNE6	SP100	TJAP1	SEPT9
EFHD2	FSTL4	TMEM45A	MED28	SLC39A1
TMEM223	MMP25	PCOLCE	CYFIP1	ORC1L
CLK4	SLC6A13	SPTLC2	C20orf27	CD1E
CASP6	UPB1	NHP2	CDC37	XYLT2
ERG	CRISP1	KIAA0141	LRRC59	ITGB7
ELP3	BCL2L1	CDC27	SRP14	RNF141
DENND2D	CDHR5	ANGPTL2	IKBKAP	NKG7
ANAPC5	GDF2	TCF15	TMEM126B	CEBPA
RPL5	SERPINA6	RABEP2	RAB11A	MRM1
EXTL2	AGPAT2	CCDC99	NPC2	BATF
TES	LAD1	RIC8A	SDR39U1	ORC6L
KLHL24	PBLD	CNPY2	FICD	FGF9
PDLIM3	CPA1	FBXL15	SEMA4G	C19orf36
TBXAS1	GLS	SHMT2	GFER	SLC7A6
NUP62	RNFT2	EIF4G3	WFDC1	GPR65
MS4A4A	ACSF2	PTP4A2	EVI2A	ZNF696
COL11A1	FZD8	NUCB2	ACOT9	TEX261
VSIG4	SLC2A5	COMMD4	ADO	CBLC
NEK3	PHF20	RNPEPL1	SH3GLB1	NLRX1
ARHGEF2	INSM1	DNAJC17	PIGO	IGHV3-23
RPS6KA5	GBX2	AURKB	TRAK2	PYCARD
IKZF2	FOLH1B	NAA38	CDKN2C	RAD9A
RNF220	SLC13A1	ERP29	C14orf138	APOBEC3B
TPM2	CREB3L1	PIK3CD	HINT1	YY1AP1
NFASC	C9orf68	IDS	PUS3	L1CAM
CA10	SSTR2	VAT1	PPBP	NUDCD3
CHRNA6	SMARCC1	LBR	CELF1	SH2B1
ZNF185	EIF3B	DNAJB2	PHF16	UCN
ZNF671	SERPINF2	KLRK1	SOX18	MVD
IGFBP2	ACOXL	APRT	SEC22A	ACHE
ERMP1	ITPK1	ZNF562	UBA3	COL6A2
PCOLCE2	ZFP2	FAM49B	COX6B1	SLC19A1
PLA2R1	DPYS	THBS3	MYO9B	HOMER3
PSG9	BCL3	RFXANK	C17orf62	CCL5
CASP10	VNN2	KCNN4	GMFG	FLJ39639
FLRT3	GRRP1	VPS28	ARPC5L	HAMP
ATF6	GINS2	FAM111A	CHORDC1	CD72
PRR13	MARCKS	FHL3	SELE	RABIF
NCSTN	ZC3H14	DFFB	IGFBP7	SRRT
CALR	CCNB2	NME3	CDO1	CHEK1
ZFAND6	LST1	FEN1	TMEM14A	TLR1
ALS2CL	UFM1	MORC2	ANAPC10	KCNAB2
KLK7	EIF2S1	DDX19A	CCDC86	TMEM106C
CDK19	TMEM165	PCID2	BAG4	CCDC51
NPAS3	RPP30	IRF2	MMD	CLP1
SNX19	RAB31	CCNB1	ZDHHC18	VCPIP1
ICK	DPY19L1	ZWINT	C6orf35	PTP4A3
MAPKAP1	TINAGL1	FUBP1	DCLK1	C19orf61
PPA2	PTPN21	RPL12	CORO1A	DOC2A
ALDH3B2	EAPP	RBM6	ALG13	BCAT2
TJP1	ENC1	LIMD2	EXTL3	FKBPL
TBC1D9B	ANXA1	APOL6	ST8SIA1	APOA2
CENPC1	ERGIC2	PNPLA6	RAB32	AHNAK2
ANKMY1	IFI30	KIAA0226	C9orf114	ABHD8
CCDC90A	IFFO1	TREX1	VDAC1	ROBO3
ARL2	TRPC6	METTL4	PAM	SRC
RSF1	MYOF	KARS	STX8	ITGB2
IMPG2	TUBA1B	C17orf70	KCMF1	SNTA1
GKN1	PCBP1	VCAN	GSK3B	EIF4E2
THRAP3	WDR4	SIN3B	INPP5D	CACNG1
SELP	USPL1	RPL13A	MYO1E	GABRR1
TARDBPL	ATP1A2	METTL3	SASH3	GRWD1
SOX11	TNFRSF11B	DCPS	OSTM1	STIP1
ERBB4	CSF1R	ABCG1	CACNB3	NCAPG
GUCY2F	MAP2K5	EIF4EBP1	SLC16A5	EED
CHAF1A	CLIC2	TNFSF12	YIPF3	DHDDS
SGK2	PSMD7	BASP1	TP53	KIR2DL3
MAP3K13	AOAH	GTF3C3	STK39	SULT2B1
TYRO3	GNL3	ME2	MFAP3	CD300A
NUMA1	MGAT2	SERPINA3	RAD50	KAT2A
MEGF9	TMEM184B	LSM2	PIK3C2B	P2RX7
SPAM1	ADORA3	EWSR1	TKT	EXOSC7
BRAF	UPF1	TUBA3C	DAD1	CRABP2
TCOF1	PCSK7	TRAPPC2L	SSR2	C7orf16
CDHR1	YME1L1	CDIPT	ATG3	PGAP3
WRB	CD34	PTPRCAP	NAB1	CUL9
ARL3	CCNE2	C20orf29	LMO2	C1orf116
MPP1	MARCH5	C7orf49	TWF2	COL11A2
MAP2K7	POLR3B	ADCY7	GPR63	SMU1
HIST1H1E	FGL2	S100A3	STK4	NANS
GYPB	IL10RA	MRPL33	VWA5A	NBEAL2
ATP6V0E2	QPCT	RAP1GAP2	NR3C1	STX10
CTDSPL	ACVRL1	GINS3	CLN5	MAFG
TNK1	AGPAT1	NPY1R	TAF12	PEX16
UTS2	CNOT2	GMIP	UBE2D2	MOCOS
CSH1	RNF144A	CAPG	MRPS17	LOC390363
UQCR10	C3orf14	COBRA1	CD38	PWP2
PRKCA	MEF2C	GGA3	FADS3	ARFGEF2
DCAKD	MED22	C13orf18	PRELP	FOLR3
KDM4B	PECAM1	C15orf63	GNG11	PDCD1
TRIM13	C1orf27	RPL26L1	XBP1	NUDT1
YEATS4	KIAA0101	DERL1	SPRY1	SLC15A3
MBNL1	ACTA2	RNPEP	SHFM1	CEP164
ZBTB43	KIF20A	ORC5L	TM2D1	ETV6
PRDM13	PRKCH	ZBED2	ZNF8	DTYMK
CXCR7	WDR8	CDK4	C11orf95	FN1
FBLN2	TLR7	NDST2	LY96	CINP
ICAM5	C6orf162	LEPREL2	RBM5	CA5A
CIRBP	VAV1	MPZL1	BPGM	PLEKHA4
SENP7	TIE1	CLIC4	TFPI2	NDC80
HIST1H1A	WDR12	GPR183	GNG5	TMEM51
ADAMTS7		ANO10	DERL2	KEL
DZIP3		COMT	CD2	MMS19
PIGL		RABAC1	PVRIG	TRMT61A
NAV3		LSM1	PSMD1	PICK1
C17orf48		RNF44	PLEKHO2	AGRP
FBXW7		FPR1	PSTPIP2	MTERF
C10orf79		PRR14	TIA1	GPAA1
RUNX2		ADAM10	CLCN3	ELAVL3
PCF11		PQBP1	TMEM39A	PSMC3IP
POLR3G		C7orf42	CUEDC1	FER1L4
C11orf63		ISYNA1	HCFC2	CFP
FRS3		PES1	PARP12	SEMA4C
ACY1		RPS2	SRPRB	TLE6
HCN2		C5orf13	ARPC5	OIP5
PRKAB1		HIF1AN	FABP4	SEC24C
FRY		GAS7	PDE6D	TREM2
PLEC		D4S234E	ARHGEF15	DEFA4
CARTPT		ZC3HAV1	TSSC1	RPA4
CLN6		EDC4	PGP	SMO
GRIA4		TFPI	INTS6	DGKQ
MLN		HCCS	AHSA1	DNMT3A
RNF167		HEATR1	C19orf50	IRF8
CBARA1		NLRP3	COL4A2	MAP2K2
PLD1		MPV17	RASL12	SEMA6B
PZP		ICAM3	EIF3I	PPIL2
DPPA4		DGAT1	C7orf44	MTMR14
EIF4E		GGT5	PSMD14	CD19
NDRG1		MAPK14	RPL27	MEGF6
CYP2A7		CSNK1E	CAP2	TRMU
CYP2A6		RABGGTA	ITK	SRPX2
KCNV1		SDS	TMBIM4	ARPC1B
C1orf66		TELO2	PAPOLA	PPYR1
A1CF		POLR2E	COPB2	POLD4
CUL7		EFEMP2	DONSON	H1FX
USP9X		ACTR5	IL10RB	DCTN5
TBX4		PDE2A	TNFAIP1	PGM3
CES2		SGCE	RANBP6	NCAPH2
RCAN3		RBM19	PCYT1A	FDXR
RAB26		CTSW	MAP1B	CLDN7
DSG1		M6PR	CD14	USP4
WDR48		CTCF	CYP20A1	TNPO1
ADAMTS13		PSMB3	TBCE	SPINK4
RAB2A		PLIN3	MED6	MELK
ZFP106		DHX8	SAP30L	ADD2
RTEL1		SEMA4F	ADORA2A	CHI3L2
KCNN3		FAM160B2	NDP	GNB1L
SEPP1		DEF8	PPP1R7	MUL1
LARP4		SLC36A1	ARRB1	EEF1A2
NRP2		GCH1	RABEPK	CEACAM4
MNAT1		IFIT5	RUSC1	HBB
KHK		MERTK	STMN3	DOLPP1
GOLIM4		FKBP10	TLR8	DOCK2
		GALNT7	GEMIN6	CHCHD7
		NAGPA	C12orf44	TBCA
		CTDSP1	TAF1B	CD52
		CHMP6	PMS1	RARG
		APP	DBN1	WRAP53
		MSL3	BRE	RASGRP1
		ADAM17	MN1	DUSP8
		SNRPD2	FKRP	NFYA
		GFOD2	PLEK	DNAI1
		GALNT2	CST1	IDUA
		THAP11	TNF	TIPIN
		UBA52	PRAF2	CD2BP2
		ADAM12	SF3B5	MLPH
		EIF3D	ACTR3	IRF3
		DUSP11	CXCL5	TPSG1
		HERC6	OGFRL1	SBF1
		CHST11	NOL7	KDELC1
		TRANK1	APOOL	IGHV1-69
		WBSCR22	GSPT1	CKLF
		SEL1L3	GTF2H4	SLC27A5
		CD180	MECOM	DOK2
		PSMB6	FADS1	DDX39
		RPL13	CENPN	PRKCDBP
		XPO6	FIG4	ARFGAP2
		FOXJ2	BMI1	PMS2L1
		HNRNPH3	EIF2B2	LALBA
		C19orf24	SNF8	CDK5RAP1
		VPS35	HK3	DUSP10
		PHC2	LY86	LMAN2L
		SLCO2A1	WDR3	BCKDHA
		RPA1	NGLY1	MRPS18A
		KIAA1539	CDK1	ZNF586
		AIM1	NLRP1	PTRH2
		RETN	CDC42EP1	TUBA1A
		PSMA1	KIF1C	MYD88
		NVL	ETV5	HSPB3
		ATHL1	ENAH	SLC35E1
		SKIV2L	ITGAV	MYBL2
		HAUS7	DDX50	MMP3
		TSPAN5	CCDC88A	FMO6P
		FRAT2	LRP12	TNIP2
		AP2M1	CXorf21	AVPR1B
		MAEA	WAPAL	LGALS8
		VAPB	POLR3K	ADCK2
		PPIE	PDGFRB	APOBEC3F
		XPO1	INVS	IFT122
		GNB2L1	TNFSF14	MALL
		WDR59	CYB561	NAT6
		GPR75	ZNF215	SIP1
		GH2	TAPBP	LRFN3
		CA7	ASNS	PTPN6
		FGFR4	FBXL6	THAP7
		MASP2	EMR1	GTPBP8
		GPATCH8	ZFAND3	WDR74
		GUCA1A	PTRF	SNAPC4
		IFNA1	GZMB	SPATA20
		SGCA	RAB5B	TRIM25
		AAK1	CXCL3	RNF41
		TEC	PSMB7	ENGASE
		ULK4	C14orf156	PRKCB
		OR5I1	AGGF1	ARHGDIA
		TMEM30B	LARGE	CBS
		EPHX1	STRAP	MAP3K14
		TUBB4	RAG1	PSKH1
		OR10H3	KTELC1	SERPINA7
		ADAM7	SLC6A6	KPTN
		AGAP1	ICT1	RASSF2
		SRD5A2	CD4	MMP1
		ZNF208	FLOT1	TLE2
		CLCN6	SLC43A3	CPNE1
		SMARCD1	PDIA6	NARFL
		MBD2	SPATS2	GPS2
		KIT	ZNF207	LCK
		GML	NXF3	SLC6A3
		SEZ6L	TTC19	TUT1
		PRKACG	CAND2	PRIM2
		RNF39	MYL12B	RNASE6
		VTN	NOP56	CLEC4A
		GOLPH3L	PITRM1	C14orf118
		NQO1	SSNA1	LILRA2
		FBXO40	FGD6	G6PD
		GNAL	IRAK4	IQSEC1
		TAC3	DENND4A	AVEN
		SLCO1A2	TM6SF1	RPS28P6
		ALS2CR8	LOC390998	EIF2B5
		SCMH1	RCC1	FMNL1
		CA1	AGFG1	RNF121
		TRMT61B	GSTP1	AEN
		NDOR1	MICA	LASS4
		CALML4	TARS	ABCG5
		FAM155B	PRKAG1	CD48
		BCKDHB	TCIRG1	MAPK3
		FAM162A	GJA4	TRAPPC9
		NXT2	SSR4	NXT1
		CCDC106	PWP1	ALDH3A1
		BTC	JAM2	PPY
		SAFB2	KCNH2	MCM4
		ABCD2	ZNF202	ZC3H12A
		CNTNAP2	PSMB10	VPS72
		STRN3	SIDT2	TSPAN15
		PACRG	HIST1H2AG	ASPSCR1
		UAP1	ITGB3BP	MICALL1
		PRL	LAIR2	PYCRL
		GYS2	NOP16	GPR132
		HDDC2	SNRNP35	ATP5I
		SLC10A1	CSTB	KLF13
		DSG3	DCTN3	FCN1
		MT2A	COX10	NPRL3
		ABCB11	C7orf23	SMAGP
		MOCS2	LOC730101	RPP25
		MSH5	ATIC	EVX1
		DYNC2LI1	VRK2	ZBTB17
		GJB1	COMP	MRPL4
		PCDHB1	DDIT3	DGKD
		NTSR2	ST3GAL1	CDC20
		DRD2	EMP2	SCAP
		OCA2	NOS3	IFRD2
		EN2	LMO4	LCMT1
		FBXW11	PSMD13	RUNX1
		ELK4	ZCCHC24	CRHR1
		ASB9	JAKMIP2	RELB
		TAS2R14	C2orf56	HIST1H4H
		ZDHHC4	RAMP1	IGHV3-73
		PLAC1	RBP1	CBR3
		SH2D4A	CCT4	UCK2
		PNLIP	GIMAP4	HN1
		SSTR4	NINJ2	GPR182
		RHD	STRN4	GLT25D1
		BZRAP1	NCF2	C19orf21
		NR1I2	RASSF9	UBTD1
		DYRK1A	CEBPG	LY6G5C
		NOVA1	MTPAP	NDUFA4L2
		NFIB	FNTA	ZMAT5
		RHAG	TMEM14B	FASTK
		P4HA1	LTF	POLR2D
		SLC22A1	ZNF557	NCR3
		ZNF334	VCP	IL21R
		ZNF91	LMOD1	BIN2
		PTCH1	SGK269	CYP27A1
		BCL2L14	EMG1	ABCC5
		CYP2C18	DNAJC2	DCTN1
		B4GALT6	PSMC4	EZH2
		FHIT	BDKRB2	PLEKHA9
		HCRTR1	IKBKE	DES
		MAF	CLC	C11orf49
		SCCPDH	CAPZB	SMAD3
		LOC55908	PLAG1	IGSF6
		GABRA2	LOXL2	SLC12A9
		IVNS1ABP	ZNF187	MBD3
		IL1RAPL1	SIPA1	ELOVL1
		CORIN	PDCD5	GLA
		GABRA4	MARCO	KIAA0406
		LRTM1	APTX	TMEM57
		CDH17	CFL1	HGS
		HUWE1	EIF3J	CENPM
		KLK13	SEPT5	TTC1
		TRPA1	CCL8	CD44
		SPINK5	NEO1	CHKB
		C6orf54	TMEFF1	YARS2
		TM7SF2	DULLARD	PLOD1
		TMEM11	WDR1	MAN2C1
		TRIM48	PEA15	IGKV3-20
		RNLS	VPS8	HJURP
		MFAP3L	SLC2A6	ZBTB48
		MAGEA12	TUBA4A	PUF60
		TAS2R8	FAM98A	TUFT1
		FBXO7	RSL1D1	HPS6
		STAU1	KIAA0754	SARM1
		TNS4	LIPT1	PSPN
		SCRG1	LRRC49	HDLBP
		EFHA1	HMHA1	CIB2
		CHD5	SYNGR3	CELF3
		CCR4	MRP63	CASP1
		OR3A1	PALMD	ZNF408
		ACSBG2	THUMPD2	MANF
		FSCN3	TMEM8A	CCDC81
		C6orf26	ULBP2	IGLV6-57
		PRR4	YWHAB	ADAM8
		GRIN2B	QPCTL	SPATA2L
		OPRL1	NTAN1	GPR68
		MAT2A	DNASE2	LPAR2
		PEX14	APOO	IFT46
		CAV3	ENO3	PMFBP1
		TNFSF4	ETV2	ZNF688
		DCC	TUBG1	RPUSD2
		GRM6	ATP6V1D	MXD3
		CSDE1	KCNE1L	TNFRSF6B
		RBP4	LHFPL2	CYTH4
		PON1	CCL2	ALOX5
		ACOT7	C9orf16	NOVA2
		PROL1	RAP2B	DNM1L
		PSG5	TRAF3IP2	SCNM1
		EIF2AK1	LRRC42	SETD4
		SOAT2	KPNA1	DMPK
		KIAA1045	HLA-F	CD27
		CHRNA4	SNORA64	C7orf26
		ZFYVE9	BZW2	C1orf183
		S100A5	SUB1	KIF23
		ADAM5P	PTPN22	TAF6
		PRUNE2	FGR	ATXN7L1
		KRTAP5-9	UROS	WDR62
		MBNL3	ERCC6	TOP3B
		SLC8A2	COPB1	SFT2D2
		C2orf47	GNL1	PMAIP1
		ORM1	IL1B	TSPO
		GRIA3	NGRN	NUBP1
		TMPRSS15	GLT8D2	MRPS22
		CDSN	GNA15	PDIA4
		SALL2	CSK	C17orf90
		DNAH3	PPIB	LTC4S
		GRIN1	COLQ	INHBA
		HNMT	EIF5A2	C10orf2
		ARFIP1	CLIC3	CYTSA
		C6orf108	GCNT3	WISP2
		XIAP	CLEC11A	KLHDC8A
		OR7E24	KIF18A	P2RX5
		DNAI2	HEBP2	PRPF19
		PLS1	REXO4	WWTR1
		POPDC3	ZNF239	FADD
		RAB27B	CH25H	ARSB
		LYRM1	APBB1IP	CTSS
		MAGEA5	ITGA2B	FSCN1
		RREB1	USO1	PLEKHO1
		CNGB3	MAPK10	HOXC5
		RAB11B	RAD1	AP1M2
		TMEM35	PPARG	TPO
		GGTLC1	TXNL4A	TSSC4
		GNRHR	RFC4	TNNC2
		ADAM30	NUP88	CPSF4
		PAAF1	FKBP3	NAT9
		PLCL1	GTPBP3	GABRR2
		C4orf19	CD1D	TMCO6
		CDKL1	KIAA0907	ASF1B
		CNGA3	TICAM1	ARPC4
		KERA	SLC35A2	ZNF764
		EMX2	NECAP2	GPR35
		ZCCHC4	ARSJ	CALHM2
		CLIP3	ELK3	TESC
		COX7C	KIAA1462	RPL13P5
		NME5	TMEM158	PMVK
		TBX10	GGPS1	SLCO2B1
		DERA	WNT8B	LDB1
		ADAM20	PLA2G7	C1orf50
		EDIL3	PPCS	GDF3
		C6orf97	GGCX	NR2F6
		KCNK2	USP14	NOL4
		PEG3	C9orf6	C16orf88
		LRAT	RHOQ	KCNC4
		MEP1B	ATF7IP	ITGA2
		ZBTB7C	TRIM21	ACP2
		SNX13	DNAJC15	RECQL4
		PDZD2	CDK16	TOE1
		RRAS2	MTX2	RPS6KA4
		AKAP6	COL6A3	TMEM185B
		THPO	FCGR2B	TNIK
		MYH2	TRMT112	LTB4R2
		SEC63	FTSJ1	MAN2B1
		IL5RA	ANGPTL4	RHOH
		YWHAE	ZNHIT6	RPL18
		KLF5	TM9SF1	RELA
		RAB7L1	HARS	FOXC2
		SPAG11B	KCNK15	COX7A2
		OPRM1	SNTG2	HMGB3
		NMNAT2	FASTKD5	ADAP1
		HOXC13	CTPS	CRYBB1
		TYRP1	HOXA11	IGLV1-40
		INHBC	MAP1LC3C	PDCD10
		RHEB	PSMB8	PNO1
		DSCR4	DUSP4	BRIP1
		MAGEC1	RRP7A	CD40
		CLDN14	CLEC10A	P2RY10
		MMP14	CKS2	FZR1
		BRP44	DMTF1	NIP7
		MOAP1	NHEJ1	CCL21
		ALOXE3	BICD2	GZMA
		GGA2	NCKAP1L	E2F1
		PRDM14	CREM	LRFN4
		COLEC10	BTAF1	YIPF2
		AOC2	HOXD11	APC2
		KRT38	HSPA4	SLC1A4
		MUSK	SLC25A14	AGER
		A4GNT	GPKOW	WSB1
		KCNMB2	UPK1A	MYNN
		LIPG	PPID	AUTS2
		ANKRD7	PTCD1	GIGYF2
		AIPL1	RASA2	C10orf76
		ZC3H13	SYNGR2	SPSB1
		DBC1	LIG3	BNIP3L
		DUSP2	PCDHB13	ERAP1
		KRT83	BTN3A1	MCL1
		EPB41L3	DDT	ELL2
		CA6	KRT17	EPS15
		CADPS	PSMD6	GOLGA3
		BSN	TMEM50B	INSL4
		SLC22A2	EIF2B3	HNRNPA1
		ATP2B2	THOC6	NUMB
		PRRG3	LOC391020	MYST3
		PHKB	CRTAC1	MARCH7
		C4orf31	NOTCH1	TMEM2
		C6orf10	SPI1	COL4A3
		GIF	PAPPA	TGFBR2
		DFNB31	MYO1F	CIZ1
		CRHR2	RPL36AL	HNRNPH2
		GRK5	FHL5	EML1
		TAS2R7	ZSCAN2	FAM114A2
		HTR2C	MCM10	PPP3CA
		VIPR2	GAPDH	TLK1
		ACADS	RUFY1	ATP1B3
		NAA11	TSR1	MTA2
		OXT	MID2	TSPAN7
		CAPN9	MFSD1	ANKS1B
		SLC17A6	PLA2G4A	SMR3A
		RNGTT	TK1	SAP18
		MAP2K3	HBBP1	INPP1
		DST	NDUFA2	SMEK1
		IL3	PGCP	MCF2
		AADAC	C10orf119	RAB1A
		C6orf134	PAFAH1B2	KLF10
		ROGDI	PGLS	NEBL
		AVPR1A	CSPG4	SLC7A8
		ABCD3	NDUFA7	CSHL1
		PDE3A	ELOVL5	CACNA2D3
		GNB5	SNX1	DMD
		NLGN1	AIDA	C20orf20
		SULT2A1	FAM38B	PTP4A1
		SEMA4D	RRP8	KCNAB3
		ALOX12P2	NMT2	TNC
		TOB2	DYNC1I1	BTG2
		TBC1D29	ABCF2	KDM5B
		MYO1D	CCDC41	CHMP5
		ESRRA	NAA15	ARPP21
		CHP	NUP85	HAL
		C1orf135	TSEN34	PLOD2
		TRPM1	MGLL	LZTFL1
		ACAD8	SND1	RBM25
		ME1	ZNF816A	C19orf6
		CYP46A1	PIAS2	SEC23A
		TMED3	C3	PTGES3
		OR7E156P	ARHGEF6	FLJ11235
		UNC5C	MMRN2	ARFGAP3
		CUL3	PPIP5K1	C18orf1
		CASP9	LBH	FOS
		SLN	RBPMS	IBTK
		TMEM151B	ZNF365	MTRR
		PCYT1B	EFHC2	PIBF1
		SSX3	VILL	CEBPD
		UST	GPR4	BTN2A1
		ABCC9	AGTR1	ATP10D
		HIST1H2AL	MAN1B1	SCEL
		OR2B2	HIST1H2BD	PAXIP1
		LEPR	CASP3	SLBP
		RPS6KA6	ERO1LB	MYRIP
		ZNF141	ADARB1	MTDH
		ATP2B3	DNAJC8	LPIN1
		SCN3B	EVI2B	VRK1
		E2F5	CDCA3	FUT8
		SIM2	CYP1B1	ENPP4
		ETFDH	NUP93	CHIC2
		LTBP4	DOHH	PERP
		GRHPR	WDHD1	AZI2
		KRTAP9-9	NADK	SEC14L1
		ACOX1	C9orf156	FKBP5
		SOX2	AP4E1	ARL14
		ZNF335	LAMA2	RP2
		CETN2	MFSD5	CPSF6
		PPP1R3A	ADAM19	KIAA0125
		BFSP2	RBM12B	PAFAH1B1
		SERPINB13	NECAP1	PTPRB
		ZG16	MOGS	SIAH1
		SUPV3L1	RHOC	C11orf61
		MYT1L	TMEM33	LEMD3
		TEX13B	ADAMDEC1	TRIM2
		ZC4H2	KLHL2	LPL
		COMMD10	CHD3	PPP3CC
		SPTAN1	HSD17B12	USP10
		ZNF506	CHST2	MKRN1
		VEGFA	ATP5S	USP15
		RRH	UBE2E3	PRPF4B
		KIAA0232	LANCL2	SPINLW1
		CLPTM1	ERO1L	PLSCR1
		PGBD5	DAPP1	MBNL2
		KIAA1644	SRF	EPM2AIP1
		CYSLTR2	LRP1	TRPC1
		CHRNE	TCEB3	IQGAP2
		C2orf34	RAB23	ANP32E
		HTR1E	ANXA2	TTC33
		ATXN2	SMPD2	SGK1
		DMRT1	PSME2	UBL3
		ADAM3A	IRX5	GHR
		XDH	TMEM62	EPYC
		GABRA3	C5orf15	ABCA8
		HOMER1	LIPA	C14orf139
		SLC44A4	HOXA9	AVPI1
		FAIM2	TAPBPL	DDIT4
		TOR1AIP1	ETF1	F2R
		PLCH1	TARS2	ARID4B
		MED21	ZAP70	CR1
		C21orf2	NDUFB8	TOP2B
		SULT1B1	ANTXR1	IL12A
		ZNF192	FAM63A	NBEA
		API5	ANXA2P3	RERE
		GTF2A2	MMRN1	PKP4
		MIPEP	IL1RL1	GREB1L
		TSGA10	NIT1	PCDHB6
		CCDC21	DYNLRB1	UBXN2B
		CNTN5	VSIG10	RANBP9
		IKZF3	C21orf59	EP300
		KRT24	SLC31A1	EIF5B
		ZNF274	OR51E2	SRP72
		TBL1X	DPP3	PTPRA
		DCTD	LRRK1	SFRS2B
		AKT3	ITGAM	PER1
		YTHDF3	MMP10	APPL1
		CYP7A1	PIK3CG	FAM172A
		CD3G	ZNF419	SEPT10
		SMPX	GTSE1	SIRT1
		MORC1	NOP10	B3GALT1
		TBC1D19	BBS9	KIF16B
		TP63	NUP155	MOBKL3
		LRRC31	TBX21	RALGAPA1
		GABRA6	NAT10	C11orf75
		FGF23	LSM4	TSPYL5
		SLC25A21	POR	GPR32
		PLA2G2E	GREM1	PAK2
		CORO2B	AP1S2	DTX4
		RFPL1S	MFN1	LPIN2
		LPAL2	PRF1	ARID4A
		UQCRB	ZFYVE26	KIAA0831
		ALDH9A1	ADPGK	MTMR3
		FAM8A1	KLRC3	SON
		MAGEB4	ERP44	APOLD1
		PRDX3	HHAT	TCEAL1
		EIF4A2	F2RL2	LPHN2
		SLC25A13	SSBP2	SLC26A3
		BRSK2	RALGDS	GRIK1
		HSPB11	NOL10	ERBB2IP
		TAF4B	LPPR2	ZNF304
		TRPC5	C19orf53	CYP2E1
		EXPH5	SLC35D1	HMGN5
		TOP3A	PANX1	SACM1L
		ARMC8	MRPS14	SMC6
		SPATA2	SCO2	KLHL9
		DBF4B	KIF20B	RPAP3
		DLX2	PTEN	PARD6B
		LACTB2	MAB21L1	GRIK3
		BCL2L11	ZCCHC10	MORF4L1
		IL17RB	TULP3	HSPA2
		TRPC3	UMPS	HLTF
		ACACA	TOR1B	SORT1
		HCFC1	CD160	SPG20
		HTN1	LIN7B	PLS3
		EIF1B	LCN2	NEDD9
		C17orf101	DALRD3	CATSPERG
		RLF	EXOSC2	SIRPA
		PDHA1	PITPNA	CCR3
		C1GALT1	ACOT8	MACF1
		SETD3	PIN1	SECISBP2L
		TAT	TRAT1	EYA4
		CMA1	ZNF593	NCKAP1
		OCEL1	SV2A	BCLAF1
		TCP10	DNAJB9	ITM2A
		RRAGB	SAC3D1	MIA2
		SPAG6	NDUFC2	PISD
		HNRNPU	MNT	C4orf6
		PDSS2	HNRNPAB	TET3
		PEX5L	RRP15	NEK4
		GCM2	TCF4	FAM134B
		CHRNB4	IFITM2	HSD17B6
		ASL	AMMECR1	CAPN7
			ZNF133	HIST1H4E
			SNUPN	HIF1A
			FLII	FNDC3A
			SMUG1	ACTR6
			HOXA10	DIS3
			WARS2	RAD17
			TPP2	TP53BP2
			ASNSD1	SGK3
			MYCT1	GGNBP2
			NRGN	TRDMT1
			PEX26	CSGALNACT2
			TNFRSF10D	SPINT2
			RAB9A	DACH1
			FAIM	ANKRD57
			PPP2R5B	ATP4B
			SSR3	RBBP6
			ACTN4	RDX
			HTRA2	LOC390411
			ADAM9	ZNF286A
			SETD6	ARHGEF10
			MAGOH	BACH1
			ATP5G2	ZDHHC13
			TTPAL	CRISPLD2
			AP4M1	OR1A2
			C2CD2L	DYNC1H1
			DNAJB5	LPGAT1
			RWDD2B	TSPYL2
			HSPA8	SNAI2
			FLI1	PADI3
			TNS3	USP2
			HEY2	EFR3A
			VDAC3	SPAST
			ETV4	ROBO1
			CEP170	BRD1
			NPTXR	GRM1
			PRPF3	MED12
			TLE4	RAP1A
			UTP14A	TCERG1
			CRTAP	ANKRA2
			NAT15	CALD1
			PRPF18	DMC1
			LCP1	RGS5
			ATAD3A	ZNF280D
			RPS19	RANBP2
			CALM1	FRMD4B
			CNGA1	PRPS1L1
			MSC	DMP1
			KLC1	MAGEA11
			ISG20	RHCG
			SIL1	SOS1
			C1orf123	OR10H2
			SNRNP70	EIF3M
			MPP6	HIVEP2
			TMEM5	CASD1
			VAMP1	UTP3
			NUDT15	TOPBP1
			NDUFAB1	TSC22D1
			NDUFS2	PAPD7
			PDIA5	SDCCAG1
			BOLA1	IL26
			FLT3LG	KIAA1012
			PI4KA	IGHV3-47
			C4orf43	HTR3B
			MATN1	TASP1
			FAM32A	MTMR1
			CCT5	TXNDC9
			TBC1D12	ITGA6
			REEP2	C11orf58
			AMD1	KLRG1
			BUB1	IAPP
			MAP3K12	PTPRD
			CCNK	IMPA1
			MYLIP	PIGA
			AMH	BIRC3
			ZMPSTE24	LDB2
			C1QTNF3	TSPYL4
			SEC61A2	CCL17
			C16orf45	PTGS2
			SNRNP27	SLC24A3
			MCOLN1	GABRP
			TNFSF10	SKAP2
			DNMT3B	SPG11
			PRR7	TRIB2
			MARCH3	FAM188A
			IER2	COL4A5
			CAMTA1	WHSC2
			SRP54	SNX10
			SLCO1B3	SLCO1C1
			LRRC8E	TMEM30A
			TFG	S100PBP
			BCAP31	CCL11
			PARP11	C5orf44
			FOXF1	WDR11
			RPL19	ZNF706
			VIP	SWAP70
			HSPE1	SH3BP5
			CCL20	ZFAND1
			POPDC2	CUL1
			MARK4	EMCN
			CASP8	DLG5
			MRPS33	CCDC91
			PRG4	SCARB2
			C17orf60	CLINT1
			PLOD3	NUDT11
			RPL24	CBX7
			C1orf112	IFNGR1
			HMGA1	RNF170
			HLA-B	PIR
			AQP3	MCF2L2
			BBS4	ARMC1
			CALCB	SLC6A16
			PDAP1	USP25
			HIVEP1	DNA2
			CAMSAP1	TOPORS
			VLDLR	PRKCI
			SMC4	ZNF518A
			SEC61B	DCP2
			RAB6B	BTBD7
			GABRE	EPHA7
			CDK7	TBC1D9
			UQCC	LGI1
			PSME1	MRS2
			DFNA5	SNAP23
			SFPQ	ZCCHC11
			RALY	PTPRO
			GAPVD1	LAPTM4B
			FAM96B	SMARCC2
			IKBKB	C4orf41
			CCDC40	SLC25A37
			CAMK1	GNG12
			RNASE2	MAPKSP1
			COX7B	C9orf78
			SSBP1	SLC1A6
			LAPTM5	CDC42EP4
			METRN	C5orf42
			C14orf2	RPRD1A
			RAB3GAP2	IFIT1
			ZNF248	C8orf79
			PAPOLG	CYP3A5
			FOXE1	PCDH8
			CUL2	KIF3A
			HAGH	SEMA3C
			ENTPD1	ADAMTS3
			KIF3C	SEPT2
			PMEPA1	FANCL
			CAMK1D	CSNK1G3
			UFD1L	TRAV36DV7
			ELAC2	ARIH2
			INTS8	KIAA1033
			SNPH	ZNF480
			WBP4	RIN2
			PEX2	PGAP1
			C17orf71	TM2D3
			AGA	LMBR1L
			MGAT4B	GLRA1
			SFTPD	PDGFRA
			SYNCRIP	TEX12
			FRZB	NUP205
			ZNF643	TMEM135
			XPO4	MAPK1IP1L
			SLC27A3	STX12
			TUBB1	LUM
			DSN1	PRPSAP2
			CLDN11	OSGIN2
			TRAM1	MMP8
			GUSB	ATXN1
			ATG5	MAGEC3
			EXOSC4	IQCK
			TMEM87A	AFAP1
			ERGIC3	OSGEPL1
			DDOST	ERLIN1
			INPP5K	SUZ12
			HSD17B1	TSC22D3
			TRAPPC4	ARMCX5
			TMEM49	DUSP6
			MED31	CDH19
			EFTUD1	LOC647288
			NEU1	DVL3
			UBAC1	LRRC17
			CAPN2	DOPEY1
			CHFR	SLC22A18AS
			SNX7	WASF3
			TGFB1I1	CXCR5
			PPP2R2A	YIPF4
			RBM4B	GPM6B
			CDT1	SH3BGRL
			TSEN2	PPAP2B
			HECA	PDS5A
			KIAA0355	TMEM47
			LAMB3	ABHD3
			FNDC4	ADIPOR2
			TIMM44	NAP1L1
			ARHGDIB	EIF3A
			MRPL48	BCAS2
			CIAO1	RBM16
			STAR	HNRNPR
			CKAP5	ACBD3
			AP1B1	ZNF442
			OAZ1	IL13RA1
			TFB1M	CHSY1
			RFC5	LAMB4
			EHD2	AKAP10
			KANK3	WDR47
			RNF34	APPBP2
			DYSF	SPAG1
			NOL11	SPIN1
			ARF3	GULP1
			MDM4	USP8
			CCL18	GLUL
			BCKDK	EXOG
			BAHD1	RCAN1
			KIF1A	ATP2B1
			DSTN	PRKD1
			PI4K2A	AGL
			SLAMF8	CAPNS1
			GPR64	CSDA
			GATA2	VPS4B
			KIAA0391	CACNG3
			KLF8	AQP4
			R3HDM1	EGR2
			MNS1	ASCL3
			TRIB3	CADPS2
			C10orf12	WBP11
			HAPLN1	PDCD4
			CTSK	PBOV1
			ARGLU1	QRSL1
			PPP3R1	GATA6
			DDB2	HSPH1
			EML2	HNRNPK
			PLXNC1	ATRX
			FAM82B	ZNF329
			NAPG	GOLGA4
			DSCC1	MAGT1
			KIAA1279	ATOH1
			HTN3	NDUFS4
			TRPV2	BACH2
			RNASEN	ZNF93
			TPPP3	ZBTB6
			TRIOBP	RABEP1
			LRRC6	LRIG1
			OBSL1	KIAA1009
			TMEM214	TMEM206
			MTAP	ARL1
			ADCY3	SEH1L
			ANAPC13	PELI1
			PCMT1	ART4
			SEMA3F	APC
			TXNRD1	CHN2
			COPS7A	NUDT4
			SUPT3H	PER3
			CBX2	ZCCHC2
			DDX1	RAC1
			RHOBTB1	TROVE2
			LILRA5	MKRN2
			A2M	FMR1
			GRM3	FBXL2
			RAB3B	MINA
			KHNYN	HIP1
			FSTL1	ZMIZ1
			MAFF	DCTN6
			SECTM1	CEP192
			APOBEC3A	SLC38A2
			ADAMTS6	ZNF415
			IL11	RIF1
			FGFR1	FGF13
			BSDC1	CHMP2B
			UNC50	MAP4
			WNT4	KIAA0776
			CD200	ZNF493
			NARF	HLA-DPB1
			RPE	ARL15
			TRAM2	DDX60
			SNRPC	LPPR4
			YTHDF2	ZZZ3
			GALT	CCR9
			SLC29A1	SFRS5
			ZMIZ2	NDUFA1
			MITF	CSNK1G1
			HES1	GNAI3
			LOC392454	RPS6KA2
			INHBE	PLCB1
			EGLN1	ZNF451
			SEC23B	MBTPS1
			CD59	RPP38
			APOB48R	GSN
			KIAA0415	PHF2
			BTD	FAM48A
			CADM1	THUMPD1
			COL8A2	UBE2J1
			MYBL1	ATMIN
			HIST1H1C	NAE1
			SCG3	PRPF39
			MAP3K11	TSTD2
			DYRK4	GALNT4
			CCL13	C7orf64
			KDR	FBXO38
			CDCA8	CISH
			ATG9A	GOLGA7
			BTN3A2	FGF16
			GAK	IQCH
			MLH3	HOXC4
			TMEM127	MDFIC
			SCUBE2	ADD3
			TTC26	ARID5B
			BTN3A3	EXOC1
			ARF5	BIRC2
			MAGOHB	OXSR1
			UBXN1	GPR125
			ZZEF1	CMAH
			GOLGA1	RASSF8
			TGFB2	LHFP
			CDC25B	FAM13A
			LTA4H	PNRC1
			SMYD2	RYK
			MEA1	OSBPL10
			TRPC4	C1orf103
			FAF1	FCGR3B
			SKIL	MYH10
			KATNA1	ARMCX3
			CYP4B1	PTPRZ1
			TRAF2	EP400
			ASF1A	YTHDC2
			ANKLE2	IL4
			ANKRD2	ANKS1A
			GALNT10	PCDHA3
			LSM3	ATP11B
			CDK6	SLK
			STAM	RBM39
			PXMP4	CSRNP2
			ARMC6	DIXDC1
			BBS10	UBE2Q1
			HNRNPA2B1	COPA
			LIMA1	RAB3A
			PIN4	REV3L
			UBE2W	ESF1
			CARM1	USP1
			REEP1	PRMT3
			RALGAPB	KLHL3
			MYB	PER2
			LCMT2	FAM135A
			PIGN	ZNF468
			PCBP4	RIBC2
			SH2D2A	S1PR1
			FAM136A	CDV3
			PDHX	LRRC1
			IMPAD1	ARMCX1
			MAN1A2	ZNF385D
			RPS27L	CKAP2
			NCBP1	PTPN12
			MS4A6A	PRND
			CDK2	NUP54
			TUBGCP5	TIPARP
			LARS2	IDH3A
			DUSP7	SFRS13A
			CTSZ	FJX1
			MECR	INSIG2
			LIMK1	FOXN3
			SKA1	TBC1D8
			WDR76	ANKHD1
			PARVB	AOC3
			TBC1D30	KIDINS220
			NDUFS5	MPZ
			TMEM194A	SLC13A4
			SUPT4H1	ABCA11P
			IL17B	NDUFA5
			STYK1	UTY
			GABRB1	GPC3
			KHDRBS3	TULP4
			MARCKSL1	TAF4
			HIPK2	QKI
			RAI2	PSMD10
			TRAF6	FOXD2
			GPD2	TMX1
			C14orf132	KCNJ8
			C14orf147	SCML2
			CYTH3	CALY
			SERF2	TMEM204
			ATG4B	TSHB
			DYNC1LI2	PLEKHB2
			CFB	ROD1
			GALNS	PAQR3
			CSNK2B	CLCA4
			HLA-DMB	NISCH
			C11orf73	GGCT
			MATN3	UBE3A
			MRPS30	C14orf45
			SMARCA1	UBE2V2
			KIFC1	LOR
			FBXO41	FAM107A
			ARID5A	PPP1R12B
			GABPB1	SLC20A1
			NCAM1	PDGFC
			MFSD11	LITAF
			DUSP3	GOLPH3
			C19orf56	TNP2
			UBE2D4	SHROOM2
			SEP15	PLCB4
			XRCC4	SHOC2
			APH1B	PFDN4
			NDUFA6	PEX12
			VWA1	SEC24A
			NBR2	KDM3B
			CRYAB	FBXO17
			FGG	MOBKL1B
			LPXN	SGMS1
			SNAPC2	USP9Y
			IFI44	SOX30
			FAM155A	ZNF257
			FKBP2	PHLPP1
			P2RX1	HIST1H3F
			ZC3H15	OTC
			ASCL2	MTR
			EEF1E1	FNDC3B
			CYP51A1	YES1
			OR1D4	MAGEF1
			STAT6	KRCC1
			TRIM8	PTGER3
			C11orf10	GAN
			INPP5B	SMNDC1
			FLT4	FAM5C
			CDH3	DCAF16
			FCN3	MORC4
			SRI	TBP
			FAM173A	FGF12
			NOL8	PRSS16
			PBX1	RPL3L
			MED20	NAALAD2
			RTN1	RNF11
			AMPD2	ESRRG
			LEPROTL1	LOC729799
			ZBBX	PCDH11Y
			CYP11A1	AKAP13
			EFNA2	DNTTIP2
			SUV39H2	SIK3
			CLK3	MAGI1
			CYP24A1	DEDD
			CTGF	CCNC
			SNRPD3	AHNAK
			CUTC	TMED5
			RFC2	CTNNA1
			KIAA1199	C6orf155
			MMP11	KCNA4
			PLBD1	CSTF3
			NLRP2	SHANK2
			HLA-C	TACC1
			KIAA0284	ANXA7
			NRXN3	SMARCE1
			STAT4	FZD4
			TUSC2	POLR2B
			HAUS3	HSPA5
			NCBP2	RBMXL2
			TTR	C1RL
			SNX24	AASS
			FUT4	CD207
			STYXL1	SFRS2
			PHACTR2	MAN2B2
			GALNT6	SORCS3
			IL12RB1	CCDC121
			TMEM177	CXADR
			RHOA	CRKL
			ATG12	VPS53
			HAUS2	PPP2CB
			VTI1B	SCAPER
			TMX2	CRYBA1
			TARBP1	ZMYM4
			TFPT	ST8SIA3
			EPRS	HERC1
			ZNF443	SYCP1
			ZNF528	PURG
			TAF5L	RAPGEF4
			MLC1	SFRS18
			THOC1	ATXN7
			MFAP5	ZC3H7A
			ITGA8	NFKBIA
			NUPL2	ITGBL1
			CAPRIN2	PALLD
			PTTG2	EML4
			TNFRSF11A	SLC30A9
			RECQL	PRCP
			BCL10	MAP4K5
			TTC12	WIPF1
			TPBG	ITFG1
			MNDA	SLC33A1
			GEMIN8	RAC3
			FAS	CTSO
			LYVE1	SMAD7
			TTC13	OLAH
			ACTR1B	ZNF184
			ANO3	TCN1
			NDUFS3	BNIP2
			IK	TRIM68
			VPS37C	PPP2R5A
			SEC31A	BRDT
			BRCC3	CNOT8
			NSF	FNBP4
			OPTN	BMPR2
			TNFRSF14	DNAJB4
			C11orf68	GLCE
			FAM49A	CDK17
			ZNF536	XCL1
			PLN	ETNK1
			PFAS	CDC14A
			MPHOSPH10	CDC42SE1
			ZNF354A	YIPF5
			ST3GAL5	NPTN
			ALAS2	ABCD4
			AHR	SERPINB4
			APOF	GNAT3
			ITGA3	SCARF1
			PKD2L2	CERK
			CTSA	GALNT3
			CAMK1G	IFT57
			CYLD	HNRNPD
			PRR16	ADCY1
			CYCS	SYCP2
			GNB1	SULT1E1
			TOR1A	ZNF222
			HDAC1	PTPRM
			MTA1	MAN1A1
			NGFRAP1	PRKRIR
			WASF1	CBR1
			SNAPC1	KPNB1
			TRPM8	NIPSNAP3B
			ATP6V0B	ELAC1
			NFKB2	ZNF223
			PTGDR	LYST
			POLR1C	KCNJ13
			ZNF428	CUX1
			IMP3	LOC728999
			TMOD3	WSB2
			NDUFC1	GPM6A
			LARP7	DNAJC10
			DCHS1	OXR1
			SCRIB	WDR37
			F5	PCGF3
			CDKN2A	SFRS2IP
			C5orf45	KDM6A
			FBXL5	FAM175B
			WDTC1	DPYD
			C8orf51	NEK1
			ATP6V0A4	TRIO
			IL13	CA2
			PDE8A	UCHL5
			ACSL1	PQLC1
			TEX11	DLEC1
			HNF4A	RHOT1
			SMARCA2	ZBED4
			A4GALT	CYP2C9
			GADD45G	TRBC1
			BCL2L13	EDEM2
			BPHL	HAUS6
			RHOBTB2	SPOCK1
			ACBD4	HTATSF1
			FOXE3	MUC5B
			CTSL2	PNMA2
			PBXIP1	NPHP4
			SELENBP1	MKL2
			DNASE1L3	RNF139
			L2HGDH	RASGRP3
			RSAD2	RNF32
			GPA33	LUC7L2
			ASS1	MFSD6
			REC8
			PEG10
			HERC3
			LAMP3
			ZNF510
			SOX3
			SMPDL3A
			MUC13
			CLASP1
			MT4
			SDHA
			HSPA12A
			GREB1
			PECI
			CALCA
			AMT
			PIK3IP1
			CTSB
			HLF
			ECHS1
			PHF7
			AQP7
			SLCO4C1
			SH3GLB2
			MMP24
			APOE
			TRHDE
			NCOA2
			BAHCC1
			MCCC2
			ENPP2
			EPHX2
			ZBTB22
			NGF
			SLC22A4
			WWP2
			ZNF160
			B3GALNT1
			MBTPS2
			ACSM5
			PIK3C2G
			PHKA2
			FAM35A
			AUH
			AKAP1
			SUCLG1
			IL1R2
			PVALB
			CNNM2
			TAF1
			ADI1
			RHO
			PRR15L
			CXCL12
			ST18
			C15orf2
			HAAO
			SLC43A1
			AFF4
			ITGA9
			NEUROD6
			IGLV3-19
			BAIAP3
			LOX
			ANKRD55
			CRH
			KIAA1109
			BCAS3
			C2orf72
			RHBG
			GPC4
			JARID2
			INSIG1
			FOXRED2
			PIP4K2B
			GDPD2
			DEPDC5
			C7
			TST
			PLCE1
			SLC11A2
			PGPEP1
			SPTBN4
			PCBP2
			GPR161
			DAB2
			SENP2
			TRPM3
			AIFM1
			MFN2
			DCUN1D2
			FOXI1
			TUB
			S100A7
			GPR22
			ADNP2
			FOXO1
			ATP6V1G2
			FAM46A
			ATP6V1B1
			WHSC1L1
			CHST5
			EDAR
			SOX10
			DHRS3
			AFP
			KCNG1
			MKL1
			PARK2
			ZFPM2
			ST8SIA5
			MYOD1
			PTPRS
			CCNG2
			AHCYL2
			SERPINA4
			SLC2A2
			NQO2
			AGXT
			CNIH3
			MDM1
			CLCA1
			AFF2
			CD163
			LRRC15
			FAM53B
			KHSRP
			GNMT
			ESR2
			GPT
			KCNMB4
			SLC10A2
			CRYZ
			DDAH1
			BMP8A
			CNTFR
			PLCG2
			DNASE1
			BEND5
			PRUNE
			ZXDC
			SDHB
			PRKCD
			RXRA
			CLIP1
			MTHFR
			PRDM9
			ACO2
			UNG
			RAB11FIP5
			ZMYM3
			SKAP1
			ELAVL4
			HPCA
			PNPLA2
			HSPB8
			CP110
			N4BP2L1
			DNAJC12
			OR7C2
			SP1
			SIX3
			CD209
			ESR1
			FKBP8
			TATDN2
			ALDH3B1
			ACOT11
			DHX35
			NINL
			CORO2A
			GRPR
			FXYD2
			BDH2
			RRAGC
			PPEF1
			SS18
			NUBPL
			TLN2
			HP1BP3
			DPT
			YY2
			GPD1
			MYT1
			MYBPC3
			UGT2A3
			IFT140
			FST
			HYAL1
			MAN1C1
			GLO1
			NRIP1
			RIPK4
			PRSS12
			ABCG2
			ISCA1
			MST1R
			DNAJC28
			TMBIM6
			PLEKHF2
			PARD6A
			ZC3H4
			ACVR1B
			ZSCAN5A
			COX11
			PTPN9
			KIAA0664
			NEK9
			PTGER1
			NOD1
			LGMN
			EGF
			AFTPH
			SEMA6D
			PALM
			LANCL1
			ADRA2C
			SFXN1
			ZNF821
			ABAT
			IPCEF1
			SYT13
			MOBP
			PRPH
			IGLV3-10
			GAS6
			GP5
			PPP1CB
			CLEC1A
			ITCH
			KNG1
			GLYR1
			NECAB3
			SNED1
			LRPPRC
			ARHGEF18
			PLEKHG3
			MYOZ3
			PRDM1
			EDA
			MYOG
			GRID2
			FXYD3
			MAP3K5
			RNF138
			GAMT
			LOC644035
			APOB
			HSPA1L
			CD83
			HPSE2
			JUND
			STAB2
			PRRG4
			IFNA10
			B3GNT4
			GRHL2
			KCNH6
			IFNA7
			ADRA1B
			ZNF140
			PEX3
			ASB13
			KCNJ15
			ELK1
			PIGV
			TMEM176A
			NONO
			DKFZP586I1420
			ACAA1
			CHRND
			ZNF165
			ABHD10
			C1orf222
			FMO5
			GPATCH3
			SYN2
			VIPR1
			AQP8
			GPRC5C
			PRCC
			HDAC11
			ABTB2
			PARL
			ANKRD5
			MAGIX
			TRPM6
			FAM59A
			PRLR
			FBLN5
			RABL5
			GAS2L1
			C6orf15
			ABCA2
			MYL5
			H6PD
			FAM46C
			KCNQ1
			PCTP
			CGA
			FA2H
			SET
			PAPSS2
			CLDN15
			CHD8
			SNX15
			IL17RC
			C19orf2
			SCD5
			STMN4
			MKS1
			SLC25A44
			CDH10
			COBL
			PCP4
			C7orf69
			PRNP
			RTDR1
			PAX7
			LTBP3
			MFAP4
			PARP16
			LMTK2
			LHPP
			PUM1
			ACP5
			TNKS2
			TGM5
			NCR1
			CACNA2D1
			KYNU
			IGHA1
			LRRC41
			USP24
			POU5F1P4
			TIMP2
			MAST1
			EZH1
			IRF9
			DRP2
			C2orf54
			AKAP7
			C17orf80
			GHITM
			MAP3K10
			RPP14
			LOC642533
			FAM76A
			CYP2B7P1
			ACN9
			USP34
			CXXC4
			KRT4
			BCHE
			VN1R1
			AZGP1P1
			MSH4
			ST3GAL4
			RCOR3
			C13orf1
			TRBV5-2
			PGLYRP4
			PRG3
			PSMA2
			MED14
			LOC441938
			DCT
			MCC
			GLS2
			FHOD3
			DPP6
			ATXN8OS
			GRLF1
			LRRC50
			PTPRT
			VIL1
			RIMBP2
			TDP2
			ECE1
			EGFR
			PADI1
			FCGBP
			SLC7A10
			WASL
			CAB39L
			ZNF500
			HIVEP3
			CCDC33
			PKLR
			HOXD10
			FAM184A
			GLI3
			MAN2A1
			HIPK3
			THAP4
			PIAS1
			SLC22A7
			OR1F1
			PON3
			IGFBP4
			MC2R
			AFF1
			ABCB7
			PCDHB17
			VPS39
			WDR91
			TEKT2
			BCAM
			DNAJC11
			PMM1
			NDEL1
			RAP1GAP
			ALDH1B1
			CDH9
			FDX1
			ROCK2
			UGT1A8
			ID2
			ADD1
			ZNRF4
			C2orf67
			PAK7
			EDDM3A
			JAG1
			DLGAP2
			GRIK5
			IFI44L
			OASL
			MTERFD2
			HNF1A
			IDI1
			SLC38A4
			CACNB4
			LGALS2
			ZBTB20
			ERCC2
			CKMT2
			SLC29A2
			KIF21B
			SYNE2
			HMGXB4
			TARDBP
			CLPS
			EYA2
			LOC727726
			BANK1
			SLC38A3
			HOXD9
			CHRM2
			GALNT14
			TCN2
			NR1H4
			DHCR7
			ERLIN2
			TNN
			MCHR1
			RDH8
			SERPING1
			ECH1
			TPPP
			PRB3
			CENPO
			PRB4
			ANGPT4
			VPRBP
			PVRL1
			HHLA1
			CABC1
			MAMLD1
			FMO1
			NPPA
			TIMP3
			CCL1
			ARFGEF1
			LRRC47
			LENEP
			KRT31
			APCS
			NF1
			PAIP1
			GPR12
			FAM182B
			EGR1
			RNF19B
			TRIM10
			GPX5
			MPST
			NAT8
			POGZ
			FGF22
			MT1P2
			UAP1L1
			WDR78
			CEL
			GDF15
			DVL2
			CALB2
			SLC4A5
			CLEC4E
			GALC
			TOX3
			PVT1
			SFTPB
			TSKU
			APOC2
			ERC1
			ADCY6
			RNF5
			CPLX2
			FMO4
			LLGL1
			GYPA
			C15orf44
			YBX2
			SORBS3
			SPP1
			GPRC5D
			HERC5
			PAQR5
			GTF2IRD1
			LIME1
			YTHDC1
			ASAP1
			NR2E3
			ANPEP
			LILRA4
			S100A1
			HRASLS2
			GHSR
			SLC5A5
			EPB42
			DSCR3
			FEV
			PRX
			SLC28A1
			CA4
			ARID1A
			LAMC3
			TEX13A
			NECAB2
			COIL
			BHLHB9
			SP4
			HBS1L
			PPFIA2
			WDR6
			RINT1
			PDE6G
			CDKN1B
			ADM2
			MTHFD1
			IRF2BP1
			C22orf46
			SLC1A7
			DTNB
			LSM14A
			KHDRBS1
			IGKC
			CYP4F12
			TRMT2B
			RPS4XP9
			RAX
			CS
			SMC1A
			ZIC1
			TPM3
			SSRP1
			OR12D3
			FZD5
			MCM2
			TIMP4
			CAPN3
			DUSP9
			HECW1
			DCI
			DDX3X
			PAX1
			CPZ
			TMCC2
			C17orf85
			SEMG1
			ANXA13
			CTAGE5
			MAP3K3
			C2orf3
			LPA
			RBM47
			PRKAR2A
			HOOK1
			MOSC1
			PRDX6
			MDFI
			TRAV8-6
			APOC3
			GNB3
			SCIN
			MAP6D1
			DARS2
			TAS2R1
			ARHGAP33
			MYL7
			HIGD1B
			RBP3
			LHX1
			ADK
			ABCB1
			ASXL1
			PPIEL
			NOX1
			ARSF
			BPI
			COL9A2
			IL17RA
			CRCP
			RGS6
			ALOX15
			TACR2
			PITPNM3
			MBP
			ACAT2
			APH1A
			ZNF85
			SDHC
			ELAVL1
			TSPAN1
			CHAD
			SPP2
			ADAM11
			HSPC072
			RAI14
			USP21
			VAMP2
			RPGRIP1
			ACAP2
			RUNDC3B
			NOS1
			ARG1
			NMBR
			PTPRN
			PC
			MYST4
			CUL5
			ZNF155
			ZNF430
			PRDM16
			TRPV6
			HABP2
			ASCL1
			PDHA2
			ITPR2
			WLS
			NPC1L1
			RAB11FIP1
			C10orf84
			YIF1B
			EDNRB
			RNF19A
			IL1F6
			AHSP
			CCL23
			LOC729580
			CACNA1I
			SETBP1
			SOS2
			PAOX
			ZNF323
			SCAMP5
			FUBP3
			EPO
			RIPK1
			ZBTB1
			PLA2G2D
			HMGB2
			REL
			PPM1A
			AIM1L
			SHBG
			IGLL3
			PRLH
			C14orf105
			ZNF654
			KDM4D
			AKR1C3
			PFKFB1
			C19orf29
			EMX1
			LRRC36
			KCNE2
			DCAF10
			TMEM176B
			CNTD2
			TEK
			AKAP4
			ADSS
			GJD2
			FOXN1
			PEX1
			PLXNB3
			UBAP1
			RALGPS1
			HNRNPA3P1
			ETV3
			RNF216
			CACNA1H
			SAP130
			MAST2
			KAT5
			CRADD
			TFAP4
			HSPA4L
			KCNJ5
			C14orf162
			FBXW4
			USP19
			SPTBN2
			GOLGA8B
			TMEM109
			NFATC3
			GJA1
			RXFP3
			GPI
			IL25
			HIRIP3
			CAPN5
			GJA8
			FAM131B
			HIC2
			INE1
			CCDC9
			PFKL
			CASR
			KCNJ3
			CCNG1
			AMHR2
			HAND2
			BRD7P3
			FNDC8
			NR2F1
			OLA1
			PHB
			HMGCS1
			FZD2
			SPINK1
			PARP6
			DTX3
			CDKL2
			OR2C1
			SHPK
			KRT81
			OXA1L
			ZMYND8
			TPSD1
			PRKG1
			ASRGL1
			ADAMTS12
			BTNL2
			APITD1
			HTR5A
			PDPK1
			ROR1
			GRN
			CNBP
			PHEX
			CYP2A13
			WNT10B
			PDE1C
[truncated: 59 more rows]

## Sheet: Supplementary Table 3
Disease	Rank	score	Perturbation	Perturbation LIFE URL	Perturbation PubChem URL	Perturbation DrugBank URL	Cell-line	Dose	Time	Signature URL
FSGS	1	0.0383	Narciclasine	http://life.ccs.miami.edu/life/summary?mode=SmallMolecule&source=BROAD&input=BRD-K06792661	http://pubchem.ncbi.nlm.nih.gov/summary/summary.cgi?cid=72376	None	PC3	10.0um	24.0h	https://maayanlab.cloud/L1000CDS2/meta?sig_id=CPC006_PC3_24H:BRD-K06792661:10.0
	2	0.0306	Narciclasine	http://life.ccs.miami.edu/life/summary?mode=SmallMolecule&source=BROAD&input=BRD-K06792661	http://pubchem.ncbi.nlm.nih.gov/summary/summary.cgi?cid=72376	None	HT29	10.0um	6.0h	https://maayanlab.cloud/L1000CDS2/meta?sig_id=CPC006_HT29_6H:BRD-K06792661:10.0
	3	0.0296	Narciclasine	http://life.ccs.miami.edu/life/summary?mode=SmallMolecule&source=BROAD&input=BRD-K06792661	http://pubchem.ncbi.nlm.nih.gov/summary/summary.cgi?cid=72376	None	HT29	10.0um	24.0h	https://maayanlab.cloud/L1000CDS2/meta?sig_id=CPC006_HT29_24H:BRD-K06792661:10.0
	4	0.0281	manumycin A	http://life.ccs.miami.edu/life/summary?mode=SmallMolecule&source=BROAD&input=BRD-K78599730	http://pubchem.ncbi.nlm.nih.gov/summary/summary.cgi?cid=44483259	None	PC3	10.0um	24.0h	https://maayanlab.cloud/L1000CDS2/meta?sig_id=CPC005_PC3_24H:BRD-K78599730:10.0
	5	0.0272	Narciclasine	http://life.ccs.miami.edu/life/summary?mode=SmallMolecule&source=BROAD&input=BRD-K06792661	http://pubchem.ncbi.nlm.nih.gov/summary/summary.cgi?cid=72376	None	A549	10.0um	6.0h	https://maayanlab.cloud/L1000CDS2/meta?sig_id=CPC006_A549_6H:BRD-K06792661:10.0
	6	0.0272	BRD-K43620258	http://life.ccs.miami.edu/life/summary?mode=SmallMolecule&source=BROAD&input=BRD-K43620258	http://pubchem.ncbi.nlm.nih.gov/summary/summary.cgi?cid=16747776	None	PC3	80.0um	24.0h	https://maayanlab.cloud/L1000CDS2/meta?sig_id=CPC006_PC3_24H:BRD-K43620258:80.0
	7	0.0257	PUROMYCIN HYDROCHLORIDE	http://life.ccs.miami.edu/life/summary?mode=SmallMolecule&source=BROAD&input=BRD-A28970875	http://pubchem.ncbi.nlm.nih.gov/summary/summary.cgi?cid=5702164	None	VCAP	10.0um	24.0h	https://maayanlab.cloud/L1000CDS2/meta?sig_id=CPC002_VCAP_24H:BRD-A28970875:10.0
	8	0.0257	KU 0060648 trihydrochloride	http://life.ccs.miami.edu/life/summary?mode=SmallMolecule&source=BROAD&input=BRD-K09499853	http://pubchem.ncbi.nlm.nih.gov/summary/summary.cgi?cid=11964036	None	MCF7	10.0um	24.0h	https://maayanlab.cloud/L1000CDS2/meta?sig_id=CPC006_MCF7_24H:BRD-K09499853:10.0
	9	0.0252	BRD-K94325918	http://life.ccs.miami.edu/life/summary?mode=SmallMolecule&source=BROAD&input=BRD-K94325918	http://pubchem.ncbi.nlm.nih.gov/summary/summary.cgi?cid=20345	None	PC3	10.0um	24.0h	https://maayanlab.cloud/L1000CDS2/meta?sig_id=CPC006_PC3_24H:BRD-K94325918:10.0
	10	0.0252	BRD-A93236127	http://life.ccs.miami.edu/life/summary?mode=SmallMolecule&source=BROAD&input=BRD-A93236127	http://pubchem.ncbi.nlm.nih.gov/summary/summary.cgi?cid=5702041	None	MCF7	10.0um	24.0h	https://maayanlab.cloud/L1000CDS2/meta?sig_id=CPC017_MCF7_24H:BRD-A93236127:10.0
	11	0.0247	Narciclasine	http://life.ccs.miami.edu/life/summary?mode=SmallMolecule&source=BROAD&input=BRD-K06792661	http://pubchem.ncbi.nlm.nih.gov/summary/summary.cgi?cid=72376	None	HA1E	10.0um	6.0h	https://maayanlab.cloud/L1000CDS2/meta?sig_id=CPC006_HA1E_6H:BRD-K06792661:10.0
	12	0.0247	BRD-A62809825	http://life.ccs.miami.edu/life/summary?mode=SmallMolecule&source=BROAD&input=BRD-A62809825	http://pubchem.ncbi.nlm.nih.gov/summary/summary.cgi?cid=5353993	None	HT29	10.0um	24.0h	https://maayanlab.cloud/L1000CDS2/meta?sig_id=CPC006_HT29_24H:BRD-A62809825:10.0
	13	0.0247	homoharringtonine	http://life.ccs.miami.edu/life/summary?mode=SmallMolecule&source=BROAD&input=BRD-A24643465	http://pubchem.ncbi.nlm.nih.gov/summary/summary.cgi?cid=16219462	None	HT29	10.0um	6.0h	https://maayanlab.cloud/L1000CDS2/meta?sig_id=CPC010_HT29_6H:BRD-A24643465:10.0
	14	0.0243	Narciclasine	http://life.ccs.miami.edu/life/summary?mode=SmallMolecule&source=BROAD&input=BRD-K06792661	http://pubchem.ncbi.nlm.nih.gov/summary/summary.cgi?cid=72376	None	PC3	10.0um	6.0h	https://maayanlab.cloud/L1000CDS2/meta?sig_id=CPC006_PC3_6H:BRD-K06792661:10.0
	15	0.0238	geldanamycin	http://life.ccs.miami.edu/life/summary?mode=SmallMolecule&source=BROAD&input=BRD-A19500257	http://pubchem.ncbi.nlm.nih.gov/summary/summary.cgi?cid=13017911	None	MCF7	10.0um	24.0h	https://maayanlab.cloud/L1000CDS2/meta?sig_id=CPC006_MCF7_24H:BRD-A19500257:10.0
	16	0.0238	ARP 101	http://life.ccs.miami.edu/life/summary?mode=SmallMolecule&source=BROAD&input=BRD-K73395020	http://pubchem.ncbi.nlm.nih.gov/summary/summary.cgi?cid=11292680	None	MCF7	10.0um	24.0h	https://maayanlab.cloud/L1000CDS2/meta?sig_id=CPC006_MCF7_24H:BRD-K73395020:10.0
	17	0.0228	CAY10594	http://life.ccs.miami.edu/life/summary?mode=SmallMolecule&source=BROAD&input=BRD-K61662457	http://pubchem.ncbi.nlm.nih.gov/summary/summary.cgi?cid=56588033	None	HT29	20.0um	24.0h	https://maayanlab.cloud/L1000CDS2/meta?sig_id=CPC006_HT29_24H:BRD-K61662457:20.0
	18	0.0228	BRD-K91370081	http://life.ccs.miami.edu/life/summary?mode=SmallMolecule&source=BROAD&input=BRD-K91370081	http://pubchem.ncbi.nlm.nih.gov/summary/summary.cgi?cid=253602	None	SKB	10.0um	24.0h	https://maayanlab.cloud/L1000CDS2/meta?sig_id=CPC016_SKB_24H:BRD-K91370081:10.0
	19	0.0223	BRD-K32896438	http://life.ccs.miami.edu/life/summary?mode=SmallMolecule&source=BROAD&input=BRD-K32896438	http://pubchem.ncbi.nlm.nih.gov/summary/summary.cgi?cid=6729593	None	MCF7	10.0um	24.0h	https://maayanlab.cloud/L1000CDS2/meta?sig_id=CPC012_MCF7_24H:BRD-K32896438:10.0
	20	0.0223	BRD-K23478508	http://life.ccs.miami.edu/life/summary?mode=SmallMolecule&source=BROAD&input=BRD-K23478508	http://pubchem.ncbi.nlm.nih.gov/summary/summary.cgi?cid=2724385	None	MCF7	10.0um	24.0h	https://maayanlab.cloud/L1000CDS2/meta?sig_id=CPC017_MCF7_24H:BRD-K23478508:10.0
	21	0.0223	BRD-K53308430	http://life.ccs.miami.edu/life/summary?mode=SmallMolecule&source=BROAD&input=BRD-K53308430	http://pubchem.ncbi.nlm.nih.gov/summary/summary.cgi?cid=44507247	None	VCAP	10.0um	24.0h	https://maayanlab.cloud/L1000CDS2/meta?sig_id=CPC020_VCAP_24H:BRD-K53308430:10.0
	22	0.0218	wortmannin	http://life.ccs.miami.edu/life/summary?mode=SmallMolecule&source=BROAD&input=BRD-A75409952	http://pubchem.ncbi.nlm.nih.gov/summary/summary.cgi?cid=5691	None	PC3	10.0um	24.0h	https://maayanlab.cloud/L1000CDS2/meta?sig_id=CPC006_PC3_24H:BRD-A75409952:10.0
	23	0.0218	BJM-ctd2-9	http://life.ccs.miami.edu/life/summary?mode=SmallMolecule&source=BROAD&input=BRD-M86331534	http://pubchem.ncbi.nlm.nih.gov/summary/summary.cgi?cid=73707397	None	SW620	10.0um	6.0h	https://maayanlab.cloud/L1000CDS2/meta?sig_id=CPC006_SW620_6H:BRD-M86331534:10.0
	24	0.0218	HY-10518	http://life.ccs.miami.edu/life/summary?mode=SmallMolecule&source=BROAD&input=BRD-K13566078	http://pubchem.ncbi.nlm.nih.gov/summary/summary.cgi?cid=9813758	None	VCAP	10.0um	24.0h	https://maayanlab.cloud/L1000CDS2/meta?sig_id=CPC014_VCAP_24H:BRD-K13566078:10.0
	25	0.0218	BRD-K91370081	http://life.ccs.miami.edu/life/summary?mode=SmallMolecule&source=BROAD&input=BRD-K91370081	http://pubchem.ncbi.nlm.nih.gov/summary/summary.cgi?cid=253602	None	A549	10.0um	6.0h	https://maayanlab.cloud/L1000CDS2/meta?sig_id=CPC016_A549_6H:BRD-K91370081:10.0
	26	0.0218	BRD-K06009608	http://life.ccs.miami.edu/life/summary?mode=SmallMolecule&source=BROAD&input=BRD-K06009608	http://pubchem.ncbi.nlm.nih.gov/summary/summary.cgi?cid=44506826	None	VCAP	10.0um	24.0h	https://maayanlab.cloud/L1000CDS2/meta?sig_id=CPC020_VCAP_24H:BRD-K06009608:10.0
	27	0.0218	PD-184352	http://life.ccs.miami.edu/life/summary?mode=SmallMolecule&source=BROAD&input=BRD-K05104363	http://pubchem.ncbi.nlm.nih.gov/summary/summary.cgi?cid=6918454	None	HT29	10um	24h	https://maayanlab.cloud/L1000CDS2/meta?sig_id=LJP005_HT29_24H:BRD-K05104363:10
	28	0.0218	LDN-193189	http://life.ccs.miami.edu/life/summary?mode=SmallMolecule&source=BROAD&input=BRD-K04853698	http://pubchem.ncbi.nlm.nih.gov/summary/summary.cgi?cid=25195294	None	SKBR3	10um	3h	https://maayanlab.cloud/L1000CDS2/meta?sig_id=LJP005_SKBR3_3H:BRD-K04853698:10
	29	0.0213	BRD-K92317137	http://life.ccs.miami.edu/life/summary?mode=SmallMolecule&source=BROAD&input=BRD-K92317137	http://pubchem.ncbi.nlm.nih.gov/summary/summary.cgi?cid=659101	None	A549	10.0um	6.0h	https://maayanlab.cloud/L1000CDS2/meta?sig_id=CPC006_A549_6H:BRD-K92317137:10.0
	30	0.0213	PK-11195	http://life.ccs.miami.edu/life/summary?mode=SmallMolecule&source=BROAD&input=BRD-A41451487	http://pubchem.ncbi.nlm.nih.gov/summary/summary.cgi?cid=1345	None	HT29	160.0um	24.0h	https://maayanlab.cloud/L1000CDS2/meta?sig_id=CPC006_HT29_24H:BRD-A41451487:160.0
	31	0.0213	MST- 312	http://life.ccs.miami.edu/life/summary?mode=SmallMolecule&source=BROAD&input=BRD-K19894101	http://pubchem.ncbi.nlm.nih.gov/summary/summary.cgi?cid=10385095	None	PC3	11.1um	24.0h	https://maayanlab.cloud/L1000CDS2/meta?sig_id=CPC006_PC3_24H:BRD-K19894101:11.1
	32	0.0213	BRD-K80786583	http://life.ccs.miami.edu/life/summary?mode=SmallMolecule&source=BROAD&input=BRD-K80786583	http://pubchem.ncbi.nlm.nih.gov/summary/summary.cgi?cid=44616501	None	MCF7	10.0um	24.0h	https://maayanlab.cloud/L1000CDS2/meta?sig_id=CPC013_MCF7_24H:BRD-K80786583:10.0
	33	0.0213	BRD-K78122587	http://life.ccs.miami.edu/life/summary?mode=SmallMolecule&source=BROAD&input=BRD-K78122587	http://pubchem.ncbi.nlm.nih.gov/summary/summary.cgi?cid=9957280	None	MCF7	10.0um	24.0h	https://maayanlab.cloud/L1000CDS2/meta?sig_id=CPC016_MCF7_24H:BRD-K78122587:10.0
	34	0.0213	Thiostrepton	http://life.ccs.miami.edu/life/summary?mode=SmallMolecule&source=BROAD&input=BRD-A52627843	http://pubchem.ncbi.nlm.nih.gov/summary/summary.cgi?cid=73707520	None	MCF7	10.0um	24.0h	https://maayanlab.cloud/L1000CDS2/meta?sig_id=CPD002_MCF7_24H:BRD-A52627843:10.0
	35	0.0213	PLX-4720	http://life.ccs.miami.edu/life/summary?mode=SmallMolecule&source=BROAD&input=BRD-K16478699	http://pubchem.ncbi.nlm.nih.gov/summary/summary.cgi?cid=24180719	None	A375	1.11um	24h	https://maayanlab.cloud/L1000CDS2/meta?sig_id=LJP005_A375_24H:BRD-K16478699:1.11
	36	0.0213	PD-0325901	http://life.ccs.miami.edu/life/summary?mode=SmallMolecule&source=BROAD&input=BRD-K49865102	http://pubchem.ncbi.nlm.nih.gov/summary/summary.cgi?cid=9826528	None	HT29	0.12um	24h	https://maayanlab.cloud/L1000CDS2/meta?sig_id=LJP005_HT29_24H:BRD-K49865102:0.12
	37	0.0213	GDC-0941	http://life.ccs.miami.edu/life/summary?mode=SmallMolecule&source=BROAD&input=BRD-K52911425	http://pubchem.ncbi.nlm.nih.gov/summary/summary.cgi?cid=17755052	None	LNCAP	1.11um	24h	https://maayanlab.cloud/L1000CDS2/meta?sig_id=LJP006_LNCAP_24H:BRD-K52911425:1.11
	38	0.0209	PERHEXILINE MALEATE	http://life.ccs.miami.edu/life/summary?mode=SmallMolecule&source=BROAD&input=BRD-A19633847	http://pubchem.ncbi.nlm.nih.gov/summary/summary.cgi?cid=5284439	None	HT29	10.0um	24.0h	https://maayanlab.cloud/L1000CDS2/meta?sig_id=CPC006_HT29_24H:BRD-A19633847:10.0
	39	0.0209	Tyrphostin AG 1478	http://life.ccs.miami.edu/life/summary?mode=SmallMolecule&source=BROAD&input=BRD-K68336408	http://pubchem.ncbi.nlm.nih.gov/summary/summary.cgi?cid=2051	None	HT29	56.78um	24.0h	https://maayanlab.cloud/L1000CDS2/meta?sig_id=CPC006_HT29_24H:BRD-K68336408:56.78
	40	0.0209	Dorsomorphin dihydrochloride	http://life.ccs.miami.edu/life/summary?mode=SmallMolecule&source=BROAD&input=BRD-K54233340	http://pubchem.ncbi.nlm.nih.gov/summary/summary.cgi?cid=11524144	None	MCF7	10.0um	24.0h	https://maayanlab.cloud/L1000CDS2/meta?sig_id=CPC006_MCF7_24H:BRD-K54233340:10.0
	41	0.0209	BRD-U33728988	http://life.ccs.miami.edu/life/summary?mode=SmallMolecule&source=BROAD&input=BRD-U33728988	None	None	SKB	10.0um	24.0h	https://maayanlab.cloud/L1000CDS2/meta?sig_id=CPC014_SKB_24H:BRD-U33728988:10.0
	42	0.0209	BRD-K91370081	http://life.ccs.miami.edu/life/summary?mode=SmallMolecule&source=BROAD&input=BRD-K91370081	http://pubchem.ncbi.nlm.nih.gov/summary/summary.cgi?cid=253602	None	HT29	10.0um	6.0h	https://maayanlab.cloud/L1000CDS2/meta?sig_id=CPC016_HT29_6H:BRD-K91370081:10.0
	43	0.0209	geldanamycin	http://life.ccs.miami.edu/life/summary?mode=SmallMolecule&source=BROAD&input=BRD-A19500257	http://pubchem.ncbi.nlm.nih.gov/summary/summary.cgi?cid=13017911	None	MCF7	10.0um	24.0h	https://maayanlab.cloud/L1000CDS2/meta?sig_id=CPC016_MCF7_24H:BRD-A19500257:10.0
	44	0.0209	BRD-A80502530	http://life.ccs.miami.edu/life/summary?mode=SmallMolecule&source=BROAD&input=BRD-A80502530	http://pubchem.ncbi.nlm.nih.gov/summary/summary.cgi?cid=23947601	None	MCF7	10.0um	24.0h	https://maayanlab.cloud/L1000CDS2/meta?sig_id=CPC017_MCF7_24H:BRD-A80502530:10.0
	45	0.0209	PHA-665752	http://life.ccs.miami.edu/life/summary?mode=SmallMolecule&source=BROAD&input=BRD-K95435023	http://pubchem.ncbi.nlm.nih.gov/summary/summary.cgi?cid=10461815	None	HT29	0.04um	24h	https://maayanlab.cloud/L1000CDS2/meta?sig_id=LJP005_HT29_24H:BRD-K95435023:0.04
	46	0.0209	vemurafenib	http://life.ccs.miami.edu/life/summary?mode=SmallMolecule&source=BROAD&input=BRD-K56343971	http://pubchem.ncbi.nlm.nih.gov/summary/summary.cgi?cid=42611257	None	HT29	10um	24h	https://maayanlab.cloud/L1000CDS2/meta?sig_id=LJP005_HT29_24H:BRD-K56343971:10
	47	0.0209	JW-7-24-1	http://life.ccs.miami.edu/life/summary?mode=SmallMolecule&source=BROAD&input=BRD-K57282030	http://pubchem.ncbi.nlm.nih.gov/summary/summary.cgi?cid=69923936	None	A549	10um	24h	https://maayanlab.cloud/L1000CDS2/meta?sig_id=LJP006_A549_24H:BRD-K57282030:10
	48	0.0204	wortmannin	http://life.ccs.miami.edu/life/summary?mode=SmallMolecule&source=BROAD&input=BRD-A75409952	http://pubchem.ncbi.nlm.nih.gov/summary/summary.cgi?cid=5691	None	PC3	10.0um	24.0h	https://maayanlab.cloud/L1000CDS2/meta?sig_id=CPC003_PC3_24H:BRD-A75409952:10.0
	49	0.0204	Tyrphostin AG 1478	http://life.ccs.miami.edu/life/summary?mode=SmallMolecule&source=BROAD&input=BRD-K68336408	http://pubchem.ncbi.nlm.nih.gov/summary/summary.cgi?cid=2051	None	A375	56.78um	24.0h	https://maayanlab.cloud/L1000CDS2/meta?sig_id=CPC006_A375_24H:BRD-K68336408:56.78
	50	0.0204	BRD-K92317137	http://life.ccs.miami.edu/life/summary?mode=SmallMolecule&source=BROAD&input=BRD-K92317137	http://pubchem.ncbi.nlm.nih.gov/summary/summary.cgi?cid=659101	None	PC3	10.0um	6.0h	https://maayanlab.cloud/L1000CDS2/meta?sig_id=CPC006_PC3_6H:BRD-K92317137:10.0
MCD	1	0.0567	PD-0325901	http://life.ccs.miami.edu/life/summary?mode=SmallMolecule&source=BROAD&input=BRD-K49865102	http://pubchem.ncbi.nlm.nih.gov/summary/summary.cgi?cid=9826528	None	HT29	0.12um	24h	https://maayanlab.cloud/L1000CDS2/meta?sig_id=LJP007_HT29_24H:BRD-K49865102:0.12
	2	0.0538	trametinib	http://life.ccs.miami.edu/life/summary?mode=SmallMolecule&source=BROAD&input=BRD-K12343256	http://pubchem.ncbi.nlm.nih.gov/summary/summary.cgi?cid=11707110	None	HT29	0.37um	24h	https://maayanlab.cloud/L1000CDS2/meta?sig_id=LJP005_HT29_24H:BRD-K12343256:0.37
	3	0.0510	AZD-8330	http://life.ccs.miami.edu/life/summary?mode=SmallMolecule&source=BROAD&input=BRD-K37687095	http://pubchem.ncbi.nlm.nih.gov/summary/summary.cgi?cid=16666708	None	HT29	1.11um	24h	https://maayanlab.cloud/L1000CDS2/meta?sig_id=LJP005_HT29_24H:BRD-K37687095:1.11
	4	0.0510	AZD-8330	http://life.ccs.miami.edu/life/summary?mode=SmallMolecule&source=BROAD&input=BRD-K37687095	http://pubchem.ncbi.nlm.nih.gov/summary/summary.cgi?cid=16666708	None	HT29	0.37um	24h	https://maayanlab.cloud/L1000CDS2/meta?sig_id=LJP005_HT29_24H:BRD-K37687095:0.37
	5	0.0482	AS605240	http://life.ccs.miami.edu/life/summary?mode=SmallMolecule&source=BROAD&input=BRD-K41895714	http://pubchem.ncbi.nlm.nih.gov/summary/summary.cgi?cid=10377751	None	HT29	10.0um	24.0h	https://maayanlab.cloud/L1000CDS2/meta?sig_id=CPC006_HT29_24H:BRD-K41895714:10.0
	6	0.0482	vorinostat	http://life.ccs.miami.edu/life/summary?mode=SmallMolecule&source=BROAD&input=BRD-K81418486	http://pubchem.ncbi.nlm.nih.gov/summary/summary.cgi?cid=5311	http://www.drugbank.ca/drugs/DB02546	MCF7	10.0um	24.0h	https://maayanlab.cloud/L1000CDS2/meta?sig_id=CPC015_MCF7_24H:BRD-K81418486:10.0
	7	0.0482	PD-184352	http://life.ccs.miami.edu/life/summary?mode=SmallMolecule&source=BROAD&input=BRD-K05104363	http://pubchem.ncbi.nlm.nih.gov/summary/summary.cgi?cid=6918454	None	HT29	10um	24h	https://maayanlab.cloud/L1000CDS2/meta?sig_id=LJP005_HT29_24H:BRD-K05104363:10
	8	0.0453	vorinostat	http://life.ccs.miami.edu/life/summary?mode=SmallMolecule&source=BROAD&input=BRD-K81418486	http://pubchem.ncbi.nlm.nih.gov/summary/summary.cgi?cid=5311	http://www.drugbank.ca/drugs/DB02546	HCC515	10.0um	24.0h	https://maayanlab.cloud/L1000CDS2/meta?sig_id=CPC001_HCC515_24H:BRD-K81418486:10.0
	9	0.0453	trichostatin A	http://life.ccs.miami.edu/life/summary?mode=SmallMolecule&source=BROAD&input=BRD-A19037878	http://pubchem.ncbi.nlm.nih.gov/summary/summary.cgi?cid=6376322	None	MCF7	10.0um	24.0h	https://maayanlab.cloud/L1000CDS2/meta?sig_id=CPC006_MCF7_24H:BRD-A19037878:10.0
	10	0.0453	trichostatin A	http://life.ccs.miami.edu/life/summary?mode=SmallMolecule&source=BROAD&input=BRD-A19037878	http://pubchem.ncbi.nlm.nih.gov/summary/summary.cgi?cid=6376322	None	HA1E	10.0um	24.0h	https://maayanlab.cloud/L1000CDS2/meta?sig_id=CPC007_HA1E_24H:BRD-A19037878:10.0
	11	0.0453	BRD-K13810148	http://life.ccs.miami.edu/life/summary?mode=SmallMolecule&source=BROAD&input=BRD-K13810148	http://pubchem.ncbi.nlm.nih.gov/summary/summary.cgi?cid=9804992	None	MCF7	10.0um	24.0h	https://maayanlab.cloud/L1000CDS2/meta?sig_id=CPC012_MCF7_24H:BRD-K13810148:10.0
	12	0.0453	trichostatin A	http://life.ccs.miami.edu/life/summary?mode=SmallMolecule&source=BROAD&input=BRD-A19037878	http://pubchem.ncbi.nlm.nih.gov/summary/summary.cgi?cid=6376322	None	MCF7	10.0um	24.0h	https://maayanlab.cloud/L1000CDS2/meta?sig_id=CPC017_MCF7_24H:BRD-A19037878:10.0
	13	0.0453	AZD-8330	http://life.ccs.miami.edu/life/summary?mode=SmallMolecule&source=BROAD&input=BRD-K37687095	http://pubchem.ncbi.nlm.nih.gov/summary/summary.cgi?cid=16666708	None	HT29	3.33um	24h	https://maayanlab.cloud/L1000CDS2/meta?sig_id=LJP005_HT29_24H:BRD-K37687095:3.33
	14	0.0453	PD-0325901	http://life.ccs.miami.edu/life/summary?mode=SmallMolecule&source=BROAD&input=BRD-K49865102	http://pubchem.ncbi.nlm.nih.gov/summary/summary.cgi?cid=9826528	None	HT29	1.11um	24h	https://maayanlab.cloud/L1000CDS2/meta?sig_id=LJP005_HT29_24H:BRD-K49865102:1.11
	15	0.0453	PI-103	http://life.ccs.miami.edu/life/summary?mode=SmallMolecule&source=BROAD&input=BRD-K67868012	http://pubchem.ncbi.nlm.nih.gov/summary/summary.cgi?cid=9884685	None	LNCAP	1.11um	24h	https://maayanlab.cloud/L1000CDS2/meta?sig_id=LJP006_LNCAP_24H:BRD-K67868012:1.11
	16	0.0453	pracinostat	http://life.ccs.miami.edu/life/summary?mode=SmallMolecule&source=BROAD&input=BRD-K86797399	None	None	A549	10um	24h	https://maayanlab.cloud/L1000CDS2/meta?sig_id=LJP008_A549_24H:BRD-K86797399:10
	17	0.0425	trichostatin A	http://life.ccs.miami.edu/life/summary?mode=SmallMolecule&source=BROAD&input=BRD-A19037878	http://pubchem.ncbi.nlm.nih.gov/summary/summary.cgi?cid=6376322	None	HCC515	10.0um	24.0h	https://maayanlab.cloud/L1000CDS2/meta?sig_id=CPC001_HCC515_24H:BRD-A19037878:10.0
	18	0.0425	NORETHINDRONE	http://life.ccs.miami.edu/life/summary?mode=SmallMolecule&source=BROAD&input=BRD-A39415247	http://pubchem.ncbi.nlm.nih.gov/summary/summary.cgi?cid=5702093	None	VCAP	10.0um	24.0h	https://maayanlab.cloud/L1000CDS2/meta?sig_id=CPC002_VCAP_24H:BRD-A39415247:10.0
	19	0.0425	Scriptaid	http://life.ccs.miami.edu/life/summary?mode=SmallMolecule&source=BROAD&input=BRD-K22503835	http://pubchem.ncbi.nlm.nih.gov/summary/summary.cgi?cid=5186	None	HCC515	10.0um	24.0h	https://maayanlab.cloud/L1000CDS2/meta?sig_id=CPC003_HCC515_24H:BRD-K22503835:10.0
	20	0.0425	KU 0060648 trihydrochloride	http://life.ccs.miami.edu/life/summary?mode=SmallMolecule&source=BROAD&input=BRD-K09499853	http://pubchem.ncbi.nlm.nih.gov/summary/summary.cgi?cid=11964036	None	A375	10.0um	24.0h	https://maayanlab.cloud/L1000CDS2/meta?sig_id=CPC006_A375_24H:BRD-K09499853:10.0
	21	0.0425	TG101348	http://life.ccs.miami.edu/life/summary?mode=SmallMolecule&source=BROAD&input=BRD-K12502280	http://pubchem.ncbi.nlm.nih.gov/summary/summary.cgi?cid=16722836	None	A375	11.1um	24.0h	https://maayanlab.cloud/L1000CDS2/meta?sig_id=CPC006_A375_24H:BRD-K12502280:11.1
	22	0.0425	trichostatin A	http://life.ccs.miami.edu/life/summary?mode=SmallMolecule&source=BROAD&input=BRD-A19037878	http://pubchem.ncbi.nlm.nih.gov/summary/summary.cgi?cid=6376322	None	HCC515	10.0um	24.0h	https://maayanlab.cloud/L1000CDS2/meta?sig_id=CPC006_HCC515_24H:BRD-A19037878:10.0
	23	0.0425	curcubitacin I	http://life.ccs.miami.edu/life/summary?mode=SmallMolecule&source=BROAD&input=BRD-A28105619	http://pubchem.ncbi.nlm.nih.gov/summary/summary.cgi?cid=73707401	None	PC3	10.0um	24.0h	https://maayanlab.cloud/L1000CDS2/meta?sig_id=CPC006_PC3_24H:BRD-A28105619:10.0
	24	0.0425	trichostatin A	http://life.ccs.miami.edu/life/summary?mode=SmallMolecule&source=BROAD&input=BRD-A19037878	http://pubchem.ncbi.nlm.nih.gov/summary/summary.cgi?cid=6376322	None	MCF7	10.0um	24.0h	https://maayanlab.cloud/L1000CDS2/meta?sig_id=CPC007_MCF7_24H:BRD-A19037878:10.0
	25	0.0425	5-fluorocytosine	http://life.ccs.miami.edu/life/summary?mode=SmallMolecule&source=BROAD&input=BRD-K82143716	http://pubchem.ncbi.nlm.nih.gov/summary/summary.cgi?cid=3366	http://www.drugbank.ca/drugs/DB01099	VCAP	10.0um	24.0h	https://maayanlab.cloud/L1000CDS2/meta?sig_id=CPC011_VCAP_24H:BRD-K82143716:10.0
	26	0.0425	selumetinib	http://life.ccs.miami.edu/life/summary?mode=SmallMolecule&source=BROAD&input=BRD-K57080016	http://pubchem.ncbi.nlm.nih.gov/summary/summary.cgi?cid=10127622	None	HT29	10um	24h	https://maayanlab.cloud/L1000CDS2/meta?sig_id=LJP006_HT29_24H:BRD-K57080016:10
	27	0.0425	AS-605240	http://life.ccs.miami.edu/life/summary?mode=SmallMolecule&source=BROAD&input=BRD-K41895714	http://pubchem.ncbi.nlm.nih.gov/summary/summary.cgi?cid=10377751	None	HT29	10um	24h	https://maayanlab.cloud/L1000CDS2/meta?sig_id=LJP006_HT29_24H:BRD-K41895714:10
	28	0.0425	pracinostat	http://life.ccs.miami.edu/life/summary?mode=SmallMolecule&source=BROAD&input=BRD-K86797399	None	None	A375	3.33um	24h	https://maayanlab.cloud/L1000CDS2/meta?sig_id=LJP008_A375_24H:BRD-K86797399:3.33
	29	0.0397	trichostatin A	http://life.ccs.miami.edu/life/summary?mode=SmallMolecule&source=BROAD&input=BRD-A19037878	http://pubchem.ncbi.nlm.nih.gov/summary/summary.cgi?cid=6376322	None	HA1E	10.0um	24.0h	https://maayanlab.cloud/L1000CDS2/meta?sig_id=CPC001_HA1E_24H:BRD-A19037878:10.0
	30	0.0397	TWS119	http://life.ccs.miami.edu/life/summary?mode=SmallMolecule&source=BROAD&input=BRD-K94176593	http://pubchem.ncbi.nlm.nih.gov/summary/summary.cgi?cid=9549289	None	HCC515	10.0um	24.0h	https://maayanlab.cloud/L1000CDS2/meta?sig_id=CPC001_HCC515_24H:BRD-K94176593:10.0
	31	0.0397	trichostatin A	http://life.ccs.miami.edu/life/summary?mode=SmallMolecule&source=BROAD&input=BRD-A19037878	http://pubchem.ncbi.nlm.nih.gov/summary/summary.cgi?cid=6376322	None	HCC515	10.0um	24.0h	https://maayanlab.cloud/L1000CDS2/meta?sig_id=CPC002_HCC515_24H:BRD-A19037878:10.0
	32	0.0397	trichostatin A	http://life.ccs.miami.edu/life/summary?mode=SmallMolecule&source=BROAD&input=BRD-A19037878	http://pubchem.ncbi.nlm.nih.gov/summary/summary.cgi?cid=6376322	None	HCC515	10.0um	24.0h	https://maayanlab.cloud/L1000CDS2/meta?sig_id=CPC003_HCC515_24H:BRD-A19037878:10.0
	33	0.0397	trichostatin A	http://life.ccs.miami.edu/life/summary?mode=SmallMolecule&source=BROAD&input=BRD-A19037878	http://pubchem.ncbi.nlm.nih.gov/summary/summary.cgi?cid=6376322	None	HA1E	10.0um	24.0h	https://maayanlab.cloud/L1000CDS2/meta?sig_id=CPC004_HA1E_24H:BRD-A19037878:10.0
	34	0.0397	vorinostat	http://life.ccs.miami.edu/life/summary?mode=SmallMolecule&source=BROAD&input=BRD-K81418486	http://pubchem.ncbi.nlm.nih.gov/summary/summary.cgi?cid=5311	http://www.drugbank.ca/drugs/DB02546	HCC515	10.0um	24.0h	https://maayanlab.cloud/L1000CDS2/meta?sig_id=CPC004_HCC515_24H:BRD-K81418486:10.0
	35	0.0397	Nutlin-3	http://life.ccs.miami.edu/life/summary?mode=SmallMolecule&source=BROAD&input=BRD-A12230535	http://pubchem.ncbi.nlm.nih.gov/summary/summary.cgi?cid=216345	None	A375	44.4um	24.0h	https://maayanlab.cloud/L1000CDS2/meta?sig_id=CPC006_A375_24H:BRD-A12230535:44.4
	36	0.0397	QUINACRINE HYDROCHLORIDE	http://life.ccs.miami.edu/life/summary?mode=SmallMolecule&source=BROAD&input=BRD-A45889380	http://pubchem.ncbi.nlm.nih.gov/summary/summary.cgi?cid=23581813	None	A375	10.0um	24.0h	https://maayanlab.cloud/L1000CDS2/meta?sig_id=CPC006_A375_24H:BRD-A45889380:10.0
	37	0.0397	DL-PDMP	http://life.ccs.miami.edu/life/summary?mode=SmallMolecule&source=BROAD&input=BRD-K05653692	http://pubchem.ncbi.nlm.nih.gov/summary/summary.cgi?cid=16219895	None	A375	64.0um	24.0h	https://maayanlab.cloud/L1000CDS2/meta?sig_id=CPC006_A375_24H:BRD-K05653692:64.0
	38	0.0397	BRD-K57080016	http://life.ccs.miami.edu/life/summary?mode=SmallMolecule&source=BROAD&input=BRD-K57080016	http://pubchem.ncbi.nlm.nih.gov/summary/summary.cgi?cid=10127622	None	HCC515	80.0um	24.0h	https://maayanlab.cloud/L1000CDS2/meta?sig_id=CPC006_HCC515_24H:BRD-K57080016:80.0
	39	0.0397	vorinostat	http://life.ccs.miami.edu/life/summary?mode=SmallMolecule&source=BROAD&input=BRD-K81418486	http://pubchem.ncbi.nlm.nih.gov/summary/summary.cgi?cid=5311	http://www.drugbank.ca/drugs/DB02546	HCC515	10.0um	24.0h	https://maayanlab.cloud/L1000CDS2/meta?sig_id=CPC006_HCC515_24H:BRD-K81418486:10.0
	40	0.0397	vorinostat	http://life.ccs.miami.edu/life/summary?mode=SmallMolecule&source=BROAD&input=BRD-K81418486	http://pubchem.ncbi.nlm.nih.gov/summary/summary.cgi?cid=5311	http://www.drugbank.ca/drugs/DB02546	MCF7	10.0um	24.0h	https://maayanlab.cloud/L1000CDS2/meta?sig_id=CPC006_MCF7_24H:BRD-K81418486:10.0
	41	0.0397	trichostatin A	http://life.ccs.miami.edu/life/summary?mode=SmallMolecule&source=BROAD&input=BRD-A19037878	http://pubchem.ncbi.nlm.nih.gov/summary/summary.cgi?cid=6376322	None	PC3	10.0um	24.0h	https://maayanlab.cloud/L1000CDS2/meta?sig_id=CPC006_PC3_24H:BRD-A19037878:10.0
	42	0.0397	taxifolin-(+/-)	http://life.ccs.miami.edu/life/summary?mode=SmallMolecule&source=BROAD&input=BRD-K95808480	http://pubchem.ncbi.nlm.nih.gov/summary/summary.cgi?cid=712318	None	VCAP	10.0um	24.0h	https://maayanlab.cloud/L1000CDS2/meta?sig_id=CPC011_VCAP_24H:BRD-K95808480:10.0
	43	0.0397	trichostatin A	http://life.ccs.miami.edu/life/summary?mode=SmallMolecule&source=BROAD&input=BRD-K68202742	http://pubchem.ncbi.nlm.nih.gov/summary/summary.cgi?cid=444732	None	MCF7	10.0um	24.0h	https://maayanlab.cloud/L1000CDS2/meta?sig_id=CPC013_MCF7_24H:BRD-K68202742:10.0
	44	0.0397	EI-293	http://life.ccs.miami.edu/life/summary?mode=SmallMolecule&source=BROAD&input=BRD-A18497530	http://pubchem.ncbi.nlm.nih.gov/summary/summary.cgi?cid=1830	None	PC3	10.0um	24.0h	https://maayanlab.cloud/L1000CDS2/meta?sig_id=CPC014_PC3_24H:BRD-A18497530:10.0
	45	0.0397	PD-184352	http://life.ccs.miami.edu/life/summary?mode=SmallMolecule&source=BROAD&input=BRD-K05104363	http://pubchem.ncbi.nlm.nih.gov/summary/summary.cgi?cid=6918454	None	A549	10um	24h	https://maayanlab.cloud/L1000CDS2/meta?sig_id=LJP005_A549_24H:BRD-K05104363:10
	46	0.0397	neratinib	http://life.ccs.miami.edu/life/summary?mode=SmallMolecule&source=BROAD&input=BRD-K85606544	http://pubchem.ncbi.nlm.nih.gov/summary/summary.cgi?cid=9915743	None	HCC515	3.33um	24h	https://maayanlab.cloud/L1000CDS2/meta?sig_id=LJP005_HCC515_24H:BRD-K85606544:3.33
	47	0.0397	PD-0325901	http://life.ccs.miami.edu/life/summary?mode=SmallMolecule&source=BROAD&input=BRD-K49865102	http://pubchem.ncbi.nlm.nih.gov/summary/summary.cgi?cid=9826528	None	HEPG2	0.04um	24h	https://maayanlab.cloud/L1000CDS2/meta?sig_id=LJP005_HEPG2_24H:BRD-K49865102:0.04
	48	0.0397	trametinib	http://life.ccs.miami.edu/life/summary?mode=SmallMolecule&source=BROAD&input=BRD-K12343256	http://pubchem.ncbi.nlm.nih.gov/summary/summary.cgi?cid=11707110	None	HT29	1.11um	24h	https://maayanlab.cloud/L1000CDS2/meta?sig_id=LJP005_HT29_24H:BRD-K12343256:1.11
	49	0.0397	PD-0325901	http://life.ccs.miami.edu/life/summary?mode=SmallMolecule&source=BROAD&input=BRD-K49865102	http://pubchem.ncbi.nlm.nih.gov/summary/summary.cgi?cid=9826528	None	HT29	0.37um	24h	https://maayanlab.cloud/L1000CDS2/meta?sig_id=LJP005_HT29_24H:BRD-K49865102:0.37
	50	0.0397	selumetinib	http://life.ccs.miami.edu/life/summary?mode=SmallMolecule&source=BROAD&input=BRD-K57080016	http://pubchem.ncbi.nlm.nih.gov/summary/summary.cgi?cid=10127622	None	A375	10um	24h	https://maayanlab.cloud/L1000CDS2/meta?sig_id=LJP006_A375_24H:BRD-K57080016:10
IgAN	1	0.0311	BMS-536924	http://life.ccs.miami.edu/life/summary?mode=SmallMolecule&source=BROAD&input=BRD-K34581968	http://pubchem.ncbi.nlm.nih.gov/summary/summary.cgi?cid=11353973	None	A375	11.1um	24.0h	https://maayanlab.cloud/L1000CDS2/meta?sig_id=CPC006_A375_24H:BRD-K34581968:11.1
	2	0.0296	Nutlin-3	http://life.ccs.miami.edu/life/summary?mode=SmallMolecule&source=BROAD&input=BRD-A12230535	http://pubchem.ncbi.nlm.nih.gov/summary/summary.cgi?cid=216345	None	A375	44.4um	24.0h	https://maayanlab.cloud/L1000CDS2/meta?sig_id=CPC006_A375_24H:BRD-A12230535:44.4
	3	0.0296	BMS-754807	http://life.ccs.miami.edu/life/summary?mode=SmallMolecule&source=BROAD&input=BRD-K13049116	http://pubchem.ncbi.nlm.nih.gov/summary/summary.cgi?cid=24785538	None	A375	10.0um	24.0h	https://maayanlab.cloud/L1000CDS2/meta?sig_id=CPC006_A375_24H:BRD-K13049116:10.0
	4	0.0296	BRD-K19295594	http://life.ccs.miami.edu/life/summary?mode=SmallMolecule&source=BROAD&input=BRD-K19295594	http://pubchem.ncbi.nlm.nih.gov/summary/summary.cgi?cid=227456	None	A375	11.1um	24.0h	https://maayanlab.cloud/L1000CDS2/meta?sig_id=CPC006_A375_24H:BRD-K19295594:11.1
	5	0.0289	TG101348	http://life.ccs.miami.edu/life/summary?mode=SmallMolecule&source=BROAD&input=BRD-K12502280	http://pubchem.ncbi.nlm.nih.gov/summary/summary.cgi?cid=16722836	None	A375	11.1um	24.0h	https://maayanlab.cloud/L1000CDS2/meta?sig_id=CPC006_A375_24H:BRD-K12502280:11.1
	6	0.0289	curcubitacin I	http://life.ccs.miami.edu/life/summary?mode=SmallMolecule&source=BROAD&input=BRD-A28105619	http://pubchem.ncbi.nlm.nih.gov/summary/summary.cgi?cid=73707401	None	PC3	10.0um	24.0h	https://maayanlab.cloud/L1000CDS2/meta?sig_id=CPC006_PC3_24H:BRD-A28105619:10.0
	7	0.0289	NVP-TAE684	http://life.ccs.miami.edu/life/summary?mode=SmallMolecule&source=BROAD&input=BRD-K50140147	http://pubchem.ncbi.nlm.nih.gov/summary/summary.cgi?cid=16038120	None	A375	1.11um	24h	https://maayanlab.cloud/L1000CDS2/meta?sig_id=LJP006_A375_24H:BRD-K50140147:1.11
	8	0.0281	Tyrphostin AG 1478	http://life.ccs.miami.edu/life/summary?mode=SmallMolecule&source=BROAD&input=BRD-K68336408	http://pubchem.ncbi.nlm.nih.gov/summary/summary.cgi?cid=2051	None	A375	56.78um	24.0h	https://maayanlab.cloud/L1000CDS2/meta?sig_id=CPC006_A375_24H:BRD-K68336408:56.78
	9	0.0281	manumycin A	http://life.ccs.miami.edu/life/summary?mode=SmallMolecule&source=BROAD&input=BRD-A77216878	http://pubchem.ncbi.nlm.nih.gov/summary/summary.cgi?cid=73707404	None	PC3	10.0um	24.0h	https://maayanlab.cloud/L1000CDS2/meta?sig_id=CPC006_PC3_24H:BRD-A77216878:10.0
	10	0.0281	BRD-K43620258	http://life.ccs.miami.edu/life/summary?mode=SmallMolecule&source=BROAD&input=BRD-K43620258	http://pubchem.ncbi.nlm.nih.gov/summary/summary.cgi?cid=16747776	None	PC3	80.0um	24.0h	https://maayanlab.cloud/L1000CDS2/meta?sig_id=CPC006_PC3_24H:BRD-K43620258:80.0
	11	0.0281	BRD-K65814004	http://life.ccs.miami.edu/life/summary?mode=SmallMolecule&source=BROAD&input=BRD-K65814004	http://pubchem.ncbi.nlm.nih.gov/summary/summary.cgi?cid=3101	None	MCF7	10.0um	24.0h	https://maayanlab.cloud/L1000CDS2/meta?sig_id=CPC017_MCF7_24H:BRD-K65814004:10.0
	12	0.0273	vorinostat	http://life.ccs.miami.edu/life/summary?mode=SmallMolecule&source=BROAD&input=BRD-K81418486	http://pubchem.ncbi.nlm.nih.gov/summary/summary.cgi?cid=5311	http://www.drugbank.ca/drugs/DB02546	HCC515	10.0um	24.0h	https://maayanlab.cloud/L1000CDS2/meta?sig_id=CPC004_HCC515_24H:BRD-K81418486:10.0
	13	0.0273	PLX-4032	http://life.ccs.miami.edu/life/summary?mode=SmallMolecule&source=BROAD&input=BRD-K56343971	http://pubchem.ncbi.nlm.nih.gov/summary/summary.cgi?cid=42611257	None	A375	10.0um	24.0h	https://maayanlab.cloud/L1000CDS2/meta?sig_id=CPC006_A375_24H:BRD-K56343971:10.0
	14	0.0273	TG101348	http://life.ccs.miami.edu/life/summary?mode=SmallMolecule&source=BROAD&input=BRD-K12502280	http://pubchem.ncbi.nlm.nih.gov/summary/summary.cgi?cid=16722836	None	MCF7	11.1um	24.0h	https://maayanlab.cloud/L1000CDS2/meta?sig_id=CPC006_MCF7_24H:BRD-K12502280:11.1
	15	0.0273	TG-101348	http://life.ccs.miami.edu/life/summary?mode=SmallMolecule&source=BROAD&input=BRD-K12502280	http://pubchem.ncbi.nlm.nih.gov/summary/summary.cgi?cid=16722836	None	A375	10um	24h	https://maayanlab.cloud/L1000CDS2/meta?sig_id=LJP005_A375_24H:BRD-K12502280:10
	16	0.0273	PD-184352	http://life.ccs.miami.edu/life/summary?mode=SmallMolecule&source=BROAD&input=BRD-K05104363	http://pubchem.ncbi.nlm.nih.gov/summary/summary.cgi?cid=6918454	None	HT29	10um	24h	https://maayanlab.cloud/L1000CDS2/meta?sig_id=LJP005_HT29_24H:BRD-K05104363:10
	17	0.0273	radicicol	http://life.ccs.miami.edu/life/summary?mode=SmallMolecule&source=BROAD&input=BRD-A39996500	http://pubchem.ncbi.nlm.nih.gov/summary/summary.cgi?cid=5311380	None	MCF10A	3.33um	24h	https://maayanlab.cloud/L1000CDS2/meta?sig_id=LJP006_MCF10A_24H:BRD-A39996500:3.33
	18	0.0266	DG-041	http://life.ccs.miami.edu/life/summary?mode=SmallMolecule&source=BROAD&input=BRD-K33272502	http://pubchem.ncbi.nlm.nih.gov/summary/summary.cgi?cid=11296282	None	A375	40.0um	24.0h	https://maayanlab.cloud/L1000CDS2/meta?sig_id=CPC006_A375_24H:BRD-K33272502:40.0
	19	0.0266	BRD-K57080016	http://life.ccs.miami.edu/life/summary?mode=SmallMolecule&source=BROAD&input=BRD-K57080016	http://pubchem.ncbi.nlm.nih.gov/summary/summary.cgi?cid=10127622	None	A375	80.0um	24.0h	https://maayanlab.cloud/L1000CDS2/meta?sig_id=CPC006_A375_24H:BRD-K57080016:80.0
	20	0.0266	BMS-536924	http://life.ccs.miami.edu/life/summary?mode=SmallMolecule&source=BROAD&input=BRD-K34581968	http://pubchem.ncbi.nlm.nih.gov/summary/summary.cgi?cid=11353973	None	HT29	11.1um	24.0h	https://maayanlab.cloud/L1000CDS2/meta?sig_id=CPC006_HT29_24H:BRD-K34581968:11.1
	21	0.0266	AZD8055	http://life.ccs.miami.edu/life/summary?mode=SmallMolecule&source=BROAD&input=BRD-K69932463	http://pubchem.ncbi.nlm.nih.gov/summary/summary.cgi?cid=25262965	None	HT29	10.0um	24.0h	https://maayanlab.cloud/L1000CDS2/meta?sig_id=CPC006_HT29_24H:BRD-K69932463:10.0
	22	0.0258	Scriptaid	http://life.ccs.miami.edu/life/summary?mode=SmallMolecule&source=BROAD&input=BRD-K22503835	http://pubchem.ncbi.nlm.nih.gov/summary/summary.cgi?cid=5186	None	HCC515	10.0um	24.0h	https://maayanlab.cloud/L1000CDS2/meta?sig_id=CPC003_HCC515_24H:BRD-K22503835:10.0
	23	0.0258	trichostatin A	http://life.ccs.miami.edu/life/summary?mode=SmallMolecule&source=BROAD&input=BRD-A19037878	http://pubchem.ncbi.nlm.nih.gov/summary/summary.cgi?cid=6376322	None	A375	10.0um	24.0h	https://maayanlab.cloud/L1000CDS2/meta?sig_id=CPC006_A375_24H:BRD-A19037878:10.0
	24	0.0258	KU 0060648 trihydrochloride	http://life.ccs.miami.edu/life/summary?mode=SmallMolecule&source=BROAD&input=BRD-K09499853	http://pubchem.ncbi.nlm.nih.gov/summary/summary.cgi?cid=11964036	None	A375	10.0um	24.0h	https://maayanlab.cloud/L1000CDS2/meta?sig_id=CPC006_A375_24H:BRD-K09499853:10.0
	25	0.0258	15-Deoxy-?12,14-prostaglandin J2	http://life.ccs.miami.edu/life/summary?mode=SmallMolecule&source=BROAD&input=BRD-K61033289	http://pubchem.ncbi.nlm.nih.gov/summary/summary.cgi?cid=12068863	None	A375	10.0um	24.0h	https://maayanlab.cloud/L1000CDS2/meta?sig_id=CPC006_A375_24H:BRD-K61033289:10.0
	26	0.0258	PP-110	http://life.ccs.miami.edu/life/summary?mode=SmallMolecule&source=BROAD&input=BRD-K03618428	http://pubchem.ncbi.nlm.nih.gov/summary/summary.cgi?cid=24905203	None	HT29	22.2um	24.0h	https://maayanlab.cloud/L1000CDS2/meta?sig_id=CPC006_HT29_24H:BRD-K03618428:22.2
	27	0.0258	dovitinib	http://life.ccs.miami.edu/life/summary?mode=SmallMolecule&source=BROAD&input=BRD-K85402309	http://pubchem.ncbi.nlm.nih.gov/summary/summary.cgi?cid=9886808	None	A375	1.11um	24h	https://maayanlab.cloud/L1000CDS2/meta?sig_id=LJP005_A375_24H:BRD-K85402309:1.11
	28	0.0258	mitoxantrone	http://life.ccs.miami.edu/life/summary?mode=SmallMolecule&source=BROAD&input=BRD-K21680192	http://pubchem.ncbi.nlm.nih.gov/summary/summary.cgi?cid=5458171	None	A375	0.12um	24h	https://maayanlab.cloud/L1000CDS2/meta?sig_id=LJP006_A375_24H:BRD-K21680192:0.12
	29	0.0258	mitoxantrone	http://life.ccs.miami.edu/life/summary?mode=SmallMolecule&source=BROAD&input=BRD-K21680192	http://pubchem.ncbi.nlm.nih.gov/summary/summary.cgi?cid=5458171	None	A549	0.37um	24h	https://maayanlab.cloud/L1000CDS2/meta?sig_id=LJP006_A549_24H:BRD-K21680192:0.37
	30	0.0258	HG-14-8-02	http://life.ccs.miami.edu/life/summary?mode=SmallMolecule&source=BROAD&input=BRD-K42805893	None	None	A375	10um	24h	https://maayanlab.cloud/L1000CDS2/meta?sig_id=LJP007_A375_24H:BRD-K42805893:10
	31	0.0251	manumycin A	http://life.ccs.miami.edu/life/summary?mode=SmallMolecule&source=BROAD&input=BRD-K78599730	http://pubchem.ncbi.nlm.nih.gov/summary/summary.cgi?cid=44483259	None	PC3	10.0um	24.0h	https://maayanlab.cloud/L1000CDS2/meta?sig_id=CPC005_PC3_24H:BRD-K78599730:10.0
	32	0.0251	7b-cis	http://life.ccs.miami.edu/life/summary?mode=SmallMolecule&source=BROAD&input=BRD-K61829047	http://pubchem.ncbi.nlm.nih.gov/summary/summary.cgi?cid=44589607	None	A375	10.0um	24.0h	https://maayanlab.cloud/L1000CDS2/meta?sig_id=CPC006_A375_24H:BRD-K61829047:10.0
	33	0.0251	trametinib	http://life.ccs.miami.edu/life/summary?mode=SmallMolecule&source=BROAD&input=BRD-K12343256	http://pubchem.ncbi.nlm.nih.gov/summary/summary.cgi?cid=11707110	None	A375	3.33um	24h	https://maayanlab.cloud/L1000CDS2/meta?sig_id=LJP005_A375_24H:BRD-K12343256:3.33
	34	0.0251	dovitinib	http://life.ccs.miami.edu/life/summary?mode=SmallMolecule&source=BROAD&input=BRD-K85402309	http://pubchem.ncbi.nlm.nih.gov/summary/summary.cgi?cid=9886808	None	A375	10um	24h	https://maayanlab.cloud/L1000CDS2/meta?sig_id=LJP005_A375_24H:BRD-K85402309:10
	35	0.0251	selumetinib	http://life.ccs.miami.edu/life/summary?mode=SmallMolecule&source=BROAD&input=BRD-K57080016	http://pubchem.ncbi.nlm.nih.gov/summary/summary.cgi?cid=10127622	None	A375	3.33um	24h	https://maayanlab.cloud/L1000CDS2/meta?sig_id=LJP006_A375_24H:BRD-K57080016:3.33
	36	0.0251	NVP-TAE684	http://life.ccs.miami.edu/life/summary?mode=SmallMolecule&source=BROAD&input=BRD-K50140147	http://pubchem.ncbi.nlm.nih.gov/summary/summary.cgi?cid=16038120	None	PC3	10um	24h	https://maayanlab.cloud/L1000CDS2/meta?sig_id=LJP006_PC3_24H:BRD-K50140147:10
	37	0.0243	geldanamycin	http://life.ccs.miami.edu/life/summary?mode=SmallMolecule&source=BROAD&input=BRD-A19500257	http://pubchem.ncbi.nlm.nih.gov/summary/summary.cgi?cid=13017911	None	A375	10.0um	24.0h	https://maayanlab.cloud/L1000CDS2/meta?sig_id=CPC006_A375_24H:BRD-A19500257:10.0
	38	0.0243	QUINACRINE HYDROCHLORIDE	http://life.ccs.miami.edu/life/summary?mode=SmallMolecule&source=BROAD&input=BRD-A45889380	http://pubchem.ncbi.nlm.nih.gov/summary/summary.cgi?cid=23581813	None	A375	10.0um	24.0h	https://maayanlab.cloud/L1000CDS2/meta?sig_id=CPC006_A375_24H:BRD-A45889380:10.0
	39	0.0243	MK-0591	http://life.ccs.miami.edu/life/summary?mode=SmallMolecule&source=BROAD&input=BRD-K39503511	http://pubchem.ncbi.nlm.nih.gov/summary/summary.cgi?cid=60923	None	A375	80.0um	24.0h	https://maayanlab.cloud/L1000CDS2/meta?sig_id=CPC006_A375_24H:BRD-K39503511:80.0
	40	0.0243	thioridazine	http://life.ccs.miami.edu/life/summary?mode=SmallMolecule&source=BROAD&input=BRD-A84481105	http://pubchem.ncbi.nlm.nih.gov/summary/summary.cgi?cid=66062	None	HT29	10.0um	24.0h	https://maayanlab.cloud/L1000CDS2/meta?sig_id=CPC006_HT29_24H:BRD-A84481105:10.0
	41	0.0243	piperlongumine (HPLC)	http://life.ccs.miami.edu/life/summary?mode=SmallMolecule&source=BROAD&input=BRD-K24132293	http://pubchem.ncbi.nlm.nih.gov/summary/summary.cgi?cid=637858	None	PC3	10.0um	24.0h	https://maayanlab.cloud/L1000CDS2/meta?sig_id=CPC006_PC3_24H:BRD-K24132293:10.0
	42	0.0243	BRD-K94325918	http://life.ccs.miami.edu/life/summary?mode=SmallMolecule&source=BROAD&input=BRD-K94325918	http://pubchem.ncbi.nlm.nih.gov/summary/summary.cgi?cid=20345	None	PC3	10.0um	24.0h	https://maayanlab.cloud/L1000CDS2/meta?sig_id=CPC006_PC3_24H:BRD-K94325918:10.0
	43	0.0243	S1367	http://life.ccs.miami.edu/life/summary?mode=SmallMolecule&source=BROAD&input=BRD-K56334280	http://pubchem.ncbi.nlm.nih.gov/summary/summary.cgi?cid=50515	None	MCF7	10.0um	24.0h	https://maayanlab.cloud/L1000CDS2/meta?sig_id=CPC013_MCF7_24H:BRD-K56334280:10.0
	44	0.0243	BRD-A35588707	http://life.ccs.miami.edu/life/summary?mode=SmallMolecule&source=BROAD&input=BRD-A35588707	http://pubchem.ncbi.nlm.nih.gov/summary/summary.cgi?cid=6708778	None	MCF7	10.0um	24.0h	https://maayanlab.cloud/L1000CDS2/meta?sig_id=CPC016_MCF7_24H:BRD-A35588707:10.0
	45	0.0243	PD-0325901	http://life.ccs.miami.edu/life/summary?mode=SmallMolecule&source=BROAD&input=BRD-K49865102	http://pubchem.ncbi.nlm.nih.gov/summary/summary.cgi?cid=9826528	None	A375	1.11um	24h	https://maayanlab.cloud/L1000CDS2/meta?sig_id=LJP005_A375_24H:BRD-K49865102:1.11
	46	0.0243	NVP-BEZ235	http://life.ccs.miami.edu/life/summary?mode=SmallMolecule&source=BROAD&input=BRD-K12184916	http://pubchem.ncbi.nlm.nih.gov/summary/summary.cgi?cid=11977753	None	A549	0.37um	24h	https://maayanlab.cloud/L1000CDS2/meta?sig_id=LJP005_A549_24H:BRD-K12184916:0.37
	47	0.0243	SB590885	http://life.ccs.miami.edu/life/summary?mode=SmallMolecule&source=BROAD&input=BRD-K24496482	None	None	HT29	3.33um	24h	https://maayanlab.cloud/L1000CDS2/meta?sig_id=LJP005_HT29_24H:BRD-K24496482:3.33
	48	0.0243	PD-0325901	http://life.ccs.miami.edu/life/summary?mode=SmallMolecule&source=BROAD&input=BRD-K49865102	http://pubchem.ncbi.nlm.nih.gov/summary/summary.cgi?cid=9826528	None	HT29	0.12um	24h	https://maayanlab.cloud/L1000CDS2/meta?sig_id=LJP005_HT29_24H:BRD-K49865102:0.12
	49	0.0243	AZD-8330	http://life.ccs.miami.edu/life/summary?mode=SmallMolecule&source=BROAD&input=BRD-K37687095	http://pubchem.ncbi.nlm.nih.gov/summary/summary.cgi?cid=16666708	None	MCF10A	1.11um	24h	https://maayanlab.cloud/L1000CDS2/meta?sig_id=LJP005_MCF10A_24H:BRD-K37687095:1.11
	50	0.0243	selumetinib	http://life.ccs.miami.edu/life/summary?mode=SmallMolecule&source=BROAD&input=BRD-K57080016	http://pubchem.ncbi.nlm.nih.gov/summary/summary.cgi?cid=10127622	None	A375	10um	24h	https://maayanlab.cloud/L1000CDS2/meta?sig_id=LJP006_A375_24H:BRD-K57080016:10
MN	1	0.0268	PP-110	http://life.ccs.miami.edu/life/summary?mode=SmallMolecule&source=BROAD&input=BRD-K03618428	http://pubchem.ncbi.nlm.nih.gov/summary/summary.cgi?cid=24905203	None	HT29	22.2um	24.0h	https://maayanlab.cloud/L1000CDS2/meta?sig_id=CPC006_HT29_24H:BRD-K03618428:22.2
	2	0.0220	TG101348	http://life.ccs.miami.edu/life/summary?mode=SmallMolecule&source=BROAD&input=BRD-K12502280	http://pubchem.ncbi.nlm.nih.gov/summary/summary.cgi?cid=16722836	None	A375	11.1um	24.0h	https://maayanlab.cloud/L1000CDS2/meta?sig_id=CPC006_A375_24H:BRD-K12502280:11.1
	3	0.0211	BMS-536924	http://life.ccs.miami.edu/life/summary?mode=SmallMolecule&source=BROAD&input=BRD-K34581968	http://pubchem.ncbi.nlm.nih.gov/summary/summary.cgi?cid=11353973	None	HT29	11.1um	24.0h	https://maayanlab.cloud/L1000CDS2/meta?sig_id=CPC006_HT29_24H:BRD-K34581968:11.1
	4	0.0195	PLX-4032	http://life.ccs.miami.edu/life/summary?mode=SmallMolecule&source=BROAD&input=BRD-K56343971	http://pubchem.ncbi.nlm.nih.gov/summary/summary.cgi?cid=42611257	None	HT29	10.0um	24.0h	https://maayanlab.cloud/L1000CDS2/meta?sig_id=CPC006_HT29_24H:BRD-K56343971:10.0
	5	0.0192	PD-0325901	http://life.ccs.miami.edu/life/summary?mode=SmallMolecule&source=BROAD&input=BRD-K49865102	http://pubchem.ncbi.nlm.nih.gov/summary/summary.cgi?cid=9826528	None	HT29	0.12um	24h	https://maayanlab.cloud/L1000CDS2/meta?sig_id=LJP005_HT29_24H:BRD-K49865102:0.12
	6	0.0189	geldanamycin	http://life.ccs.miami.edu/life/summary?mode=SmallMolecule&source=BROAD&input=BRD-A19500257	http://pubchem.ncbi.nlm.nih.gov/summary/summary.cgi?cid=13017911	None	MCF7	10.0um	24.0h	https://maayanlab.cloud/L1000CDS2/meta?sig_id=CPC006_MCF7_24H:BRD-A19500257:10.0
	7	0.0186	BRD-K57080016	http://life.ccs.miami.edu/life/summary?mode=SmallMolecule&source=BROAD&input=BRD-K57080016	http://pubchem.ncbi.nlm.nih.gov/summary/summary.cgi?cid=10127622	None	A375	80.0um	24.0h	https://maayanlab.cloud/L1000CDS2/meta?sig_id=CPC006_A375_24H:BRD-K57080016:80.0
	8	0.0186	AS605240	http://life.ccs.miami.edu/life/summary?mode=SmallMolecule&source=BROAD&input=BRD-K41895714	http://pubchem.ncbi.nlm.nih.gov/summary/summary.cgi?cid=10377751	None	HT29	10.0um	24.0h	https://maayanlab.cloud/L1000CDS2/meta?sig_id=CPC006_HT29_24H:BRD-K41895714:10.0
	9	0.0183	foretinib	http://life.ccs.miami.edu/life/summary?mode=SmallMolecule&source=BROAD&input=BRD-K03449891	http://pubchem.ncbi.nlm.nih.gov/summary/summary.cgi?cid=42642645	None	HT29	10um	24h	https://maayanlab.cloud/L1000CDS2/meta?sig_id=LJP005_HT29_24H:BRD-K03449891:10
	10	0.0170	AZD8055	http://life.ccs.miami.edu/life/summary?mode=SmallMolecule&source=BROAD&input=BRD-K69932463	http://pubchem.ncbi.nlm.nih.gov/summary/summary.cgi?cid=25262965	None	MCF7	10.0um	24.0h	https://maayanlab.cloud/L1000CDS2/meta?sig_id=CPC006_MCF7_24H:BRD-K69932463:10.0
	11	0.0170	WH-4-025	http://life.ccs.miami.edu/life/summary?mode=SmallMolecule&source=BROAD&input=BRD-U60236422	None	None	A549	10um	24h	https://maayanlab.cloud/L1000CDS2/meta?sig_id=LJP005_A549_24H:BRD-U60236422:10
	12	0.0170	PD-184352	http://life.ccs.miami.edu/life/summary?mode=SmallMolecule&source=BROAD&input=BRD-K05104363	http://pubchem.ncbi.nlm.nih.gov/summary/summary.cgi?cid=6918454	None	HT29	10um	24h	https://maayanlab.cloud/L1000CDS2/meta?sig_id=LJP005_HT29_24H:BRD-K05104363:10
	13	0.0170	GDC-0980	http://life.ccs.miami.edu/life/summary?mode=SmallMolecule&source=BROAD&input=BRD-A18328003	None	None	HT29	10um	24h	https://maayanlab.cloud/L1000CDS2/meta?sig_id=LJP005_HT29_24H:BRD-A18328003:10
	14	0.0167	geldanamycin	http://life.ccs.miami.edu/life/summary?mode=SmallMolecule&source=BROAD&input=BRD-A19500257	http://pubchem.ncbi.nlm.nih.gov/summary/summary.cgi?cid=13017911	None	A375	10.0um	24.0h	https://maayanlab.cloud/L1000CDS2/meta?sig_id=CPC006_A375_24H:BRD-A19500257:10.0
	15	0.0167	BRD-K57080016	http://life.ccs.miami.edu/life/summary?mode=SmallMolecule&source=BROAD&input=BRD-K57080016	http://pubchem.ncbi.nlm.nih.gov/summary/summary.cgi?cid=10127622	None	HT29	80.0um	24.0h	https://maayanlab.cloud/L1000CDS2/meta?sig_id=CPC006_HT29_24H:BRD-K57080016:80.0
	16	0.0167	PLX-4720	http://life.ccs.miami.edu/life/summary?mode=SmallMolecule&source=BROAD&input=BRD-K16478699	http://pubchem.ncbi.nlm.nih.gov/summary/summary.cgi?cid=24180719	None	A375	10um	24h	https://maayanlab.cloud/L1000CDS2/meta?sig_id=LJP005_A375_24H:BRD-K16478699:10
	17	0.0167	PD-0325901	http://life.ccs.miami.edu/life/summary?mode=SmallMolecule&source=BROAD&input=BRD-K49865102	http://pubchem.ncbi.nlm.nih.gov/summary/summary.cgi?cid=9826528	None	HEPG2	0.04um	24h	https://maayanlab.cloud/L1000CDS2/meta?sig_id=LJP005_HEPG2_24H:BRD-K49865102:0.04
	18	0.0164	geldanamycin	http://life.ccs.miami.edu/life/summary?mode=SmallMolecule&source=BROAD&input=BRD-A19500257	http://pubchem.ncbi.nlm.nih.gov/summary/summary.cgi?cid=13017911	None	HA1E	10.0um	24.0h	https://maayanlab.cloud/L1000CDS2/meta?sig_id=CPC006_HA1E_24H:BRD-A19500257:10.0
	19	0.0161	BMS-536924	http://life.ccs.miami.edu/life/summary?mode=SmallMolecule&source=BROAD&input=BRD-K34581968	http://pubchem.ncbi.nlm.nih.gov/summary/summary.cgi?cid=11353973	None	MCF7	11.1um	24.0h	https://maayanlab.cloud/L1000CDS2/meta?sig_id=CPC006_MCF7_24H:BRD-K34581968:11.1
	20	0.0157	KU 0060648 trihydrochloride	http://life.ccs.miami.edu/life/summary?mode=SmallMolecule&source=BROAD&input=BRD-K09499853	http://pubchem.ncbi.nlm.nih.gov/summary/summary.cgi?cid=11964036	None	A375	10.0um	24.0h	https://maayanlab.cloud/L1000CDS2/meta?sig_id=CPC006_A375_24H:BRD-K09499853:10.0
	21	0.0157	BMS-536924	http://life.ccs.miami.edu/life/summary?mode=SmallMolecule&source=BROAD&input=BRD-K34581968	http://pubchem.ncbi.nlm.nih.gov/summary/summary.cgi?cid=11353973	None	A375	11.1um	24.0h	https://maayanlab.cloud/L1000CDS2/meta?sig_id=CPC006_A375_24H:BRD-K34581968:11.1
	22	0.0157	TG101348	http://life.ccs.miami.edu/life/summary?mode=SmallMolecule&source=BROAD&input=BRD-K12502280	http://pubchem.ncbi.nlm.nih.gov/summary/summary.cgi?cid=16722836	None	HT29	11.1um	24.0h	https://maayanlab.cloud/L1000CDS2/meta?sig_id=CPC006_HT29_24H:BRD-K12502280:11.1
	23	0.0157	TPCA-1	http://life.ccs.miami.edu/life/summary?mode=SmallMolecule&source=BROAD&input=BRD-K51575138	http://pubchem.ncbi.nlm.nih.gov/summary/summary.cgi?cid=9903786	None	HT29	10.0um	24.0h	https://maayanlab.cloud/L1000CDS2/meta?sig_id=CPC006_HT29_24H:BRD-K51575138:10.0
	24	0.0157	geldanamycin	http://life.ccs.miami.edu/life/summary?mode=SmallMolecule&source=BROAD&input=BRD-A19500257	http://pubchem.ncbi.nlm.nih.gov/summary/summary.cgi?cid=13017911	None	A375	10.0um	24.0h	https://maayanlab.cloud/L1000CDS2/meta?sig_id=CPC007_A375_24H:BRD-A19500257:10.0
	25	0.0157	S1175	http://life.ccs.miami.edu/life/summary?mode=SmallMolecule&source=BROAD&input=BRD-K51967704	http://pubchem.ncbi.nlm.nih.gov/summary/summary.cgi?cid=16736529	None	MCF7	10.0um	24.0h	https://maayanlab.cloud/L1000CDS2/meta?sig_id=CPC013_MCF7_24H:BRD-K51967704:10.0
	26	0.0157	geldanamycin	http://life.ccs.miami.edu/life/summary?mode=SmallMolecule&source=BROAD&input=BRD-A19500257	http://pubchem.ncbi.nlm.nih.gov/summary/summary.cgi?cid=13017911	None	MCF7	10.0um	24.0h	https://maayanlab.cloud/L1000CDS2/meta?sig_id=CPC017_MCF7_24H:BRD-A19500257:10.0
	27	0.0157	AZD-8330	http://life.ccs.miami.edu/life/summary?mode=SmallMolecule&source=BROAD&input=BRD-K37687095	http://pubchem.ncbi.nlm.nih.gov/summary/summary.cgi?cid=16666708	None	HT29	0.37um	24h	https://maayanlab.cloud/L1000CDS2/meta?sig_id=LJP005_HT29_24H:BRD-K37687095:0.37
	28	0.0157	NVP-TAE684	http://life.ccs.miami.edu/life/summary?mode=SmallMolecule&source=BROAD&input=BRD-K50140147	http://pubchem.ncbi.nlm.nih.gov/summary/summary.cgi?cid=16038120	None	PC3	10um	24h	https://maayanlab.cloud/L1000CDS2/meta?sig_id=LJP006_PC3_24H:BRD-K50140147:10
	29	0.0154	AS605240	http://life.ccs.miami.edu/life/summary?mode=SmallMolecule&source=BROAD&input=BRD-K41895714	http://pubchem.ncbi.nlm.nih.gov/summary/summary.cgi?cid=10377751	None	A375	10.0um	24.0h	https://maayanlab.cloud/L1000CDS2/meta?sig_id=CPC006_A375_24H:BRD-K41895714:10.0
	30	0.0154	TG101348	http://life.ccs.miami.edu/life/summary?mode=SmallMolecule&source=BROAD&input=BRD-K12502280	http://pubchem.ncbi.nlm.nih.gov/summary/summary.cgi?cid=16722836	None	HCC515	11.1um	24.0h	https://maayanlab.cloud/L1000CDS2/meta?sig_id=CPC006_HCC515_24H:BRD-K12502280:11.1
	31	0.0154	BRD-K41859756	http://life.ccs.miami.edu/life/summary?mode=SmallMolecule&source=BROAD&input=BRD-K41859756	http://pubchem.ncbi.nlm.nih.gov/summary/summary.cgi?cid=10096043	None	HT29	10.0um	24.0h	https://maayanlab.cloud/L1000CDS2/meta?sig_id=CPC006_HT29_24H:BRD-K41859756:10.0
	32	0.0151	BRD-K41859756	http://life.ccs.miami.edu/life/summary?mode=SmallMolecule&source=BROAD&input=BRD-K41859756	http://pubchem.ncbi.nlm.nih.gov/summary/summary.cgi?cid=10096043	None	A375	10.0um	24.0h	https://maayanlab.cloud/L1000CDS2/meta?sig_id=CPC006_A375_24H:BRD-K41859756:10.0
	33	0.0151	AZD8055	http://life.ccs.miami.edu/life/summary?mode=SmallMolecule&source=BROAD&input=BRD-K69932463	http://pubchem.ncbi.nlm.nih.gov/summary/summary.cgi?cid=25262965	None	HT29	10.0um	24.0h	https://maayanlab.cloud/L1000CDS2/meta?sig_id=CPC006_HT29_24H:BRD-K69932463:10.0
	34	0.0151	WH-4-025	http://life.ccs.miami.edu/life/summary?mode=SmallMolecule&source=BROAD&input=BRD-U60236422	None	None	HT29	10um	24h	https://maayanlab.cloud/L1000CDS2/meta?sig_id=LJP005_HT29_24H:BRD-U60236422:10
	35	0.0151	vemurafenib	http://life.ccs.miami.edu/life/summary?mode=SmallMolecule&source=BROAD&input=BRD-K56343971	http://pubchem.ncbi.nlm.nih.gov/summary/summary.cgi?cid=42611257	None	HT29	10um	24h	https://maayanlab.cloud/L1000CDS2/meta?sig_id=LJP005_HT29_24H:BRD-K56343971:10
	36	0.0151	selumetinib	http://life.ccs.miami.edu/life/summary?mode=SmallMolecule&source=BROAD&input=BRD-K57080016	http://pubchem.ncbi.nlm.nih.gov/summary/summary.cgi?cid=10127622	None	A375	10um	24h	https://maayanlab.cloud/L1000CDS2/meta?sig_id=LJP006_A375_24H:BRD-K57080016:10
	37	0.0151	radicicol	http://life.ccs.miami.edu/life/summary?mode=SmallMolecule&source=BROAD&input=BRD-A39996500	http://pubchem.ncbi.nlm.nih.gov/summary/summary.cgi?cid=5311380	None	MCF10A	3.33um	24h	https://maayanlab.cloud/L1000CDS2/meta?sig_id=LJP006_MCF10A_24H:BRD-A39996500:3.33
	38	0.0151	HG-14-8-02	http://life.ccs.miami.edu/life/summary?mode=SmallMolecule&source=BROAD&input=BRD-K42805893	None	None	A375	10um	24h	https://maayanlab.cloud/L1000CDS2/meta?sig_id=LJP007_A375_24H:BRD-K42805893:10
	39	0.0151	PD-0325901	http://life.ccs.miami.edu/life/summary?mode=SmallMolecule&source=BROAD&input=BRD-K49865102	http://pubchem.ncbi.nlm.nih.gov/summary/summary.cgi?cid=9826528	None	HT29	10um	24h	https://maayanlab.cloud/L1000CDS2/meta?sig_id=LJP007_HT29_24H:BRD-K49865102:10
	40	0.0148	PLX-4032	http://life.ccs.miami.edu/life/summary?mode=SmallMolecule&source=BROAD&input=BRD-K56343971	http://pubchem.ncbi.nlm.nih.gov/summary/summary.cgi?cid=42611257	None	A375	10.0um	24.0h	https://maayanlab.cloud/L1000CDS2/meta?sig_id=CPC006_A375_24H:BRD-K56343971:10.0
	41	0.0148	palbociclib	http://life.ccs.miami.edu/life/summary?mode=SmallMolecule&source=BROAD&input=BRD-K51313569	http://pubchem.ncbi.nlm.nih.gov/summary/summary.cgi?cid=5330286	None	HME1	10um	24h	https://maayanlab.cloud/L1000CDS2/meta?sig_id=LJP006_HME1_24H:BRD-K51313569:10
	42	0.0145	PP-110	http://life.ccs.miami.edu/life/summary?mode=SmallMolecule&source=BROAD&input=BRD-K03618428	http://pubchem.ncbi.nlm.nih.gov/summary/summary.cgi?cid=24905203	None	A375	22.2um	24.0h	https://maayanlab.cloud/L1000CDS2/meta?sig_id=CPC006_A375_24H:BRD-K03618428:22.2
	43	0.0145	Tyrphostin AG 1478	http://life.ccs.miami.edu/life/summary?mode=SmallMolecule&source=BROAD&input=BRD-K68336408	http://pubchem.ncbi.nlm.nih.gov/summary/summary.cgi?cid=2051	None	HA1E	56.78um	24.0h	https://maayanlab.cloud/L1000CDS2/meta?sig_id=CPC006_HA1E_24H:BRD-K68336408:56.78
	44	0.0145	thioridazine	http://life.ccs.miami.edu/life/summary?mode=SmallMolecule&source=BROAD&input=BRD-A84481105	http://pubchem.ncbi.nlm.nih.gov/summary/summary.cgi?cid=66062	None	HT29	10.0um	24.0h	https://maayanlab.cloud/L1000CDS2/meta?sig_id=CPC006_HT29_24H:BRD-A84481105:10.0
	45	0.0145	BRD-A35588707	http://life.ccs.miami.edu/life/summary?mode=SmallMolecule&source=BROAD&input=BRD-A35588707	http://pubchem.ncbi.nlm.nih.gov/summary/summary.cgi?cid=6708778	None	MCF7	10.0um	24.0h	https://maayanlab.cloud/L1000CDS2/meta?sig_id=CPC016_MCF7_24H:BRD-A35588707:10.0
	46	0.0145	trametinib	http://life.ccs.miami.edu/life/summary?mode=SmallMolecule&source=BROAD&input=BRD-K12343256	http://pubchem.ncbi.nlm.nih.gov/summary/summary.cgi?cid=11707110	None	HT29	0.37um	24h	https://maayanlab.cloud/L1000CDS2/meta?sig_id=LJP005_HT29_24H:BRD-K12343256:0.37
	47	0.0145	withaferin-a	http://life.ccs.miami.edu/life/summary?mode=SmallMolecule&source=BROAD&input=BRD-K88378636	http://pubchem.ncbi.nlm.nih.gov/summary/summary.cgi?cid=265237	None	HT29	0.04um	24h	https://maayanlab.cloud/L1000CDS2/meta?sig_id=LJP005_HT29_24H:BRD-K88378636:0.04
	48	0.0145	AZD-8330	http://life.ccs.miami.edu/life/summary?mode=SmallMolecule&source=BROAD&input=BRD-K37687095	http://pubchem.ncbi.nlm.nih.gov/summary/summary.cgi?cid=16666708	None	HT29	10um	24h	https://maayanlab.cloud/L1000CDS2/meta?sig_id=LJP005_HT29_24H:BRD-K37687095:10
	49	0.0145	erlotinib	http://life.ccs.miami.edu/life/summary?mode=SmallMolecule&source=BROAD&input=BRD-K70401845	http://pubchem.ncbi.nlm.nih.gov/summary/summary.cgi?cid=176871	None	MCF10A	3.33um	24h	https://maayanlab.cloud/L1000CDS2/meta?sig_id=LJP005_MCF10A_24H:BRD-K70401845:3.33
	50	0.0145	PD-0325901	http://life.ccs.miami.edu/life/summary?mode=SmallMolecule&source=BROAD&input=BRD-K49865102	http://pubchem.ncbi.nlm.nih.gov/summary/summary.cgi?cid=9826528	None	HT29	0.12um	24h	https://maayanlab.cloud/L1000CDS2/meta?sig_id=LJP007_HT29_24H:BRD-K49865102:0.12
TBMN	1	0.0383	Narciclasine	http://life.ccs.miami.edu/life/summary?mode=SmallMolecule&source=BROAD&input=BRD-K06792661	http://pubchem.ncbi.nlm.nih.gov/summary/summary.cgi?cid=72376	None	PC3	10.0um	24.0h	https://maayanlab.cloud/L1000CDS2/meta?sig_id=CPC006_PC3_24H:BRD-K06792661:10.0
	2	0.0306	Narciclasine	http://life.ccs.miami.edu/life/summary?mode=SmallMolecule&source=BROAD&input=BRD-K06792661	http://pubchem.ncbi.nlm.nih.gov/summary/summary.cgi?cid=72376	None	HT29	10.0um	6.0h	https://maayanlab.cloud/L1000CDS2/meta?sig_id=CPC006_HT29_6H:BRD-K06792661:10.0
	3	0.0296	Narciclasine	http://life.ccs.miami.edu/life/summary?mode=SmallMolecule&source=BROAD&input=BRD-K06792661	http://pubchem.ncbi.nlm.nih.gov/summary/summary.cgi?cid=72376	None	HT29	10.0um	24.0h	https://maayanlab.cloud/L1000CDS2/meta?sig_id=CPC006_HT29_24H:BRD-K06792661:10.0
	4	0.0281	manumycin A	http://life.ccs.miami.edu/life/summary?mode=SmallMolecule&source=BROAD&input=BRD-K78599730	http://pubchem.ncbi.nlm.nih.gov/summary/summary.cgi?cid=44483259	None	PC3	10.0um	24.0h	https://maayanlab.cloud/L1000CDS2/meta?sig_id=CPC005_PC3_24H:BRD-K78599730:10.0
	5	0.0272	Narciclasine	http://life.ccs.miami.edu/life/summary?mode=SmallMolecule&source=BROAD&input=BRD-K06792661	http://pubchem.ncbi.nlm.nih.gov/summary/summary.cgi?cid=72376	None	A549	10.0um	6.0h	https://maayanlab.cloud/L1000CDS2/meta?sig_id=CPC006_A549_6H:BRD-K06792661:10.0
	6	0.0272	BRD-K43620258	http://life.ccs.miami.edu/life/summary?mode=SmallMolecule&source=BROAD&input=BRD-K43620258	http://pubchem.ncbi.nlm.nih.gov/summary/summary.cgi?cid=16747776	None	PC3	80.0um	24.0h	https://maayanlab.cloud/L1000CDS2/meta?sig_id=CPC006_PC3_24H:BRD-K43620258:80.0
	7	0.0257	PUROMYCIN HYDROCHLORIDE	http://life.ccs.miami.edu/life/summary?mode=SmallMolecule&source=BROAD&input=BRD-A28970875	http://pubchem.ncbi.nlm.nih.gov/summary/summary.cgi?cid=5702164	None	VCAP	10.0um	24.0h	https://maayanlab.cloud/L1000CDS2/meta?sig_id=CPC002_VCAP_24H:BRD-A28970875:10.0
	8	0.0257	KU 0060648 trihydrochloride	http://life.ccs.miami.edu/life/summary?mode=SmallMolecule&source=BROAD&input=BRD-K09499853	http://pubchem.ncbi.nlm.nih.gov/summary/summary.cgi?cid=11964036	None	MCF7	10.0um	24.0h	https://maayanlab.cloud/L1000CDS2/meta?sig_id=CPC006_MCF7_24H:BRD-K09499853:10.0
	9	0.0252	BRD-K94325918	http://life.ccs.miami.edu/life/summary?mode=SmallMolecule&source=BROAD&input=BRD-K94325918	http://pubchem.ncbi.nlm.nih.gov/summary/summary.cgi?cid=20345	None	PC3	10.0um	24.0h	https://maayanlab.cloud/L1000CDS2/meta?sig_id=CPC006_PC3_24H:BRD-K94325918:10.0
	10	0.0252	BRD-A93236127	http://life.ccs.miami.edu/life/summary?mode=SmallMolecule&source=BROAD&input=BRD-A93236127	http://pubchem.ncbi.nlm.nih.gov/summary/summary.cgi?cid=5702041	None	MCF7	10.0um	24.0h	https://maayanlab.cloud/L1000CDS2/meta?sig_id=CPC017_MCF7_24H:BRD-A93236127:10.0
	11	0.0247	Narciclasine	http://life.ccs.miami.edu/life/summary?mode=SmallMolecule&source=BROAD&input=BRD-K06792661	http://pubchem.ncbi.nlm.nih.gov/summary/summary.cgi?cid=72376	None	HA1E	10.0um	6.0h	https://maayanlab.cloud/L1000CDS2/meta?sig_id=CPC006_HA1E_6H:BRD-K06792661:10.0
	12	0.0247	BRD-A62809825	http://life.ccs.miami.edu/life/summary?mode=SmallMolecule&source=BROAD&input=BRD-A62809825	http://pubchem.ncbi.nlm.nih.gov/summary/summary.cgi?cid=5353993	None	HT29	10.0um	24.0h	https://maayanlab.cloud/L1000CDS2/meta?sig_id=CPC006_HT29_24H:BRD-A62809825:10.0
	13	0.0247	homoharringtonine	http://life.ccs.miami.edu/life/summary?mode=SmallMolecule&source=BROAD&input=BRD-A24643465	http://pubchem.ncbi.nlm.nih.gov/summary/summary.cgi?cid=16219462	None	HT29	10.0um	6.0h	https://maayanlab.cloud/L1000CDS2/meta?sig_id=CPC010_HT29_6H:BRD-A24643465:10.0
	14	0.0243	Narciclasine	http://life.ccs.miami.edu/life/summary?mode=SmallMolecule&source=BROAD&input=BRD-K06792661	http://pubchem.ncbi.nlm.nih.gov/summary/summary.cgi?cid=72376	None	PC3	10.0um	6.0h	https://maayanlab.cloud/L1000CDS2/meta?sig_id=CPC006_PC3_6H:BRD-K06792661:10.0
	15	0.0238	geldanamycin	http://life.ccs.miami.edu/life/summary?mode=SmallMolecule&source=BROAD&input=BRD-A19500257	http://pubchem.ncbi.nlm.nih.gov/summary/summary.cgi?cid=13017911	None	MCF7	10.0um	24.0h	https://maayanlab.cloud/L1000CDS2/meta?sig_id=CPC006_MCF7_24H:BRD-A19500257:10.0
	16	0.0238	ARP 101	http://life.ccs.miami.edu/life/summary?mode=SmallMolecule&source=BROAD&input=BRD-K73395020	http://pubchem.ncbi.nlm.nih.gov/summary/summary.cgi?cid=11292680	None	MCF7	10.0um	24.0h	https://maayanlab.cloud/L1000CDS2/meta?sig_id=CPC006_MCF7_24H:BRD-K73395020:10.0
	17	0.0228	CAY10594	http://life.ccs.miami.edu/life/summary?mode=SmallMolecule&source=BROAD&input=BRD-K61662457	http://pubchem.ncbi.nlm.nih.gov/summary/summary.cgi?cid=56588033	None	HT29	20.0um	24.0h	https://maayanlab.cloud/L1000CDS2/meta?sig_id=CPC006_HT29_24H:BRD-K61662457:20.0
	18	0.0228	BRD-K91370081	http://life.ccs.miami.edu/life/summary?mode=SmallMolecule&source=BROAD&input=BRD-K91370081	http://pubchem.ncbi.nlm.nih.gov/summary/summary.cgi?cid=253602	None	SKB	10.0um	24.0h	https://maayanlab.cloud/L1000CDS2/meta?sig_id=CPC016_SKB_24H:BRD-K91370081:10.0
	19	0.0223	BRD-K32896438	http://life.ccs.miami.edu/life/summary?mode=SmallMolecule&source=BROAD&input=BRD-K32896438	http://pubchem.ncbi.nlm.nih.gov/summary/summary.cgi?cid=6729593	None	MCF7	10.0um	24.0h	https://maayanlab.cloud/L1000CDS2/meta?sig_id=CPC012_MCF7_24H:BRD-K32896438:10.0
	20	0.0223	BRD-K23478508	http://life.ccs.miami.edu/life/summary?mode=SmallMolecule&source=BROAD&input=BRD-K23478508	http://pubchem.ncbi.nlm.nih.gov/summary/summary.cgi?cid=2724385	None	MCF7	10.0um	24.0h	https://maayanlab.cloud/L1000CDS2/meta?sig_id=CPC017_MCF7_24H:BRD-K23478508:10.0
	21	0.0223	BRD-K53308430	http://life.ccs.miami.edu/life/summary?mode=SmallMolecule&source=BROAD&input=BRD-K53308430	http://pubchem.ncbi.nlm.nih.gov/summary/summary.cgi?cid=44507247	None	VCAP	10.0um	24.0h	https://maayanlab.cloud/L1000CDS2/meta?sig_id=CPC020_VCAP_24H:BRD-K53308430:10.0
	22	0.0218	wortmannin	http://life.ccs.miami.edu/life/summary?mode=SmallMolecule&source=BROAD&input=BRD-A75409952	http://pubchem.ncbi.nlm.nih.gov/summary/summary.cgi?cid=5691	None	PC3	10.0um	24.0h	https://maayanlab.cloud/L1000CDS2/meta?sig_id=CPC006_PC3_24H:BRD-A75409952:10.0
	23	0.0218	BJM-ctd2-9	http://life.ccs.miami.edu/life/summary?mode=SmallMolecule&source=BROAD&input=BRD-M86331534	http://pubchem.ncbi.nlm.nih.gov/summary/summary.cgi?cid=73707397	None	SW620	10.0um	6.0h	https://maayanlab.cloud/L1000CDS2/meta?sig_id=CPC006_SW620_6H:BRD-M86331534:10.0
	24	0.0218	HY-10518	http://life.ccs.miami.edu/life/summary?mode=SmallMolecule&source=BROAD&input=BRD-K13566078	http://pubchem.ncbi.nlm.nih.gov/summary/summary.cgi?cid=9813758	None	VCAP	10.0um	24.0h	https://maayanlab.cloud/L1000CDS2/meta?sig_id=CPC014_VCAP_24H:BRD-K13566078:10.0
	25	0.0218	BRD-K91370081	http://life.ccs.miami.edu/life/summary?mode=SmallMolecule&source=BROAD&input=BRD-K91370081	http://pubchem.ncbi.nlm.nih.gov/summary/summary.cgi?cid=253602	None	A549	10.0um	6.0h	https://maayanlab.cloud/L1000CDS2/meta?sig_id=CPC016_A549_6H:BRD-K91370081:10.0
	26	0.0218	BRD-K06009608	http://life.ccs.miami.edu/life/summary?mode=SmallMolecule&source=BROAD&input=BRD-K06009608	http://pubchem.ncbi.nlm.nih.gov/summary/summary.cgi?cid=44506826	None	VCAP	10.0um	24.0h	https://maayanlab.cloud/L1000CDS2/meta?sig_id=CPC020_VCAP_24H:BRD-K06009608:10.0
	27	0.0218	PD-184352	http://life.ccs.miami.edu/life/summary?mode=SmallMolecule&source=BROAD&input=BRD-K05104363	http://pubchem.ncbi.nlm.nih.gov/summary/summary.cgi?cid=6918454	None	HT29	10um	24h	https://maayanlab.cloud/L1000CDS2/meta?sig_id=LJP005_HT29_24H:BRD-K05104363:10
	28	0.0218	LDN-193189	http://life.ccs.miami.edu/life/summary?mode=SmallMolecule&source=BROAD&input=BRD-K04853698	http://pubchem.ncbi.nlm.nih.gov/summary/summary.cgi?cid=25195294	None	SKBR3	10um	3h	https://maayanlab.cloud/L1000CDS2/meta?sig_id=LJP005_SKBR3_3H:BRD-K04853698:10
	29	0.0213	BRD-K92317137	http://life.ccs.miami.edu/life/summary?mode=SmallMolecule&source=BROAD&input=BRD-K92317137	http://pubchem.ncbi.nlm.nih.gov/summary/summary.cgi?cid=659101	None	A549	10.0um	6.0h	https://maayanlab.cloud/L1000CDS2/meta?sig_id=CPC006_A549_6H:BRD-K92317137:10.0
	30	0.0213	PK-11195	http://life.ccs.miami.edu/life/summary?mode=SmallMolecule&source=BROAD&input=BRD-A41451487	http://pubchem.ncbi.nlm.nih.gov/summary/summary.cgi?cid=1345	None	HT29	160.0um	24.0h	https://maayanlab.cloud/L1000CDS2/meta?sig_id=CPC006_HT29_24H:BRD-A41451487:160.0
	31	0.0213	MST- 312	http://life.ccs.miami.edu/life/summary?mode=SmallMolecule&source=BROAD&input=BRD-K19894101	http://pubchem.ncbi.nlm.nih.gov/summary/summary.cgi?cid=10385095	None	PC3	11.1um	24.0h	https://maayanlab.cloud/L1000CDS2/meta?sig_id=CPC006_PC3_24H:BRD-K19894101:11.1
	32	0.0213	BRD-K80786583	http://life.ccs.miami.edu/life/summary?mode=SmallMolecule&source=BROAD&input=BRD-K80786583	http://pubchem.ncbi.nlm.nih.gov/summary/summary.cgi?cid=44616501	None	MCF7	10.0um	24.0h	https://maayanlab.cloud/L1000CDS2/meta?sig_id=CPC013_MCF7_24H:BRD-K80786583:10.0
	33	0.0213	BRD-K78122587	http://life.ccs.miami.edu/life/summary?mode=SmallMolecule&source=BROAD&input=BRD-K78122587	http://pubchem.ncbi.nlm.nih.gov/summary/summary.cgi?cid=9957280	None	MCF7	10.0um	24.0h	https://maayanlab.cloud/L1000CDS2/meta?sig_id=CPC016_MCF7_24H:BRD-K78122587:10.0
	34	0.0213	Thiostrepton	http://life.ccs.miami.edu/life/summary?mode=SmallMolecule&source=BROAD&input=BRD-A52627843	http://pubchem.ncbi.nlm.nih.gov/summary/summary.cgi?cid=73707520	None	MCF7	10.0um	24.0h	https://maayanlab.cloud/L1000CDS2/meta?sig_id=CPD002_MCF7_24H:BRD-A52627843:10.0
	35	0.0213	PLX-4720	http://life.ccs.miami.edu/life/summary?mode=SmallMolecule&source=BROAD&input=BRD-K16478699	http://pubchem.ncbi.nlm.nih.gov/summary/summary.cgi?cid=24180719	None	A375	1.11um	24h	https://maayanlab.cloud/L1000CDS2/meta?sig_id=LJP005_A375_24H:BRD-K16478699:1.11
	36	0.0213	PD-0325901	http://life.ccs.miami.edu/life/summary?mode=SmallMolecule&source=BROAD&input=BRD-K49865102	http://pubchem.ncbi.nlm.nih.gov/summary/summary.cgi?cid=9826528	None	HT29	0.12um	24h	https://maayanlab.cloud/L1000CDS2/meta?sig_id=LJP005_HT29_24H:BRD-K49865102:0.12
	37	0.0213	GDC-0941	http://life.ccs.miami.edu/life/summary?mode=SmallMolecule&source=BROAD&input=BRD-K52911425	http://pubchem.ncbi.nlm.nih.gov/summary/summary.cgi?cid=17755052	None	LNCAP	1.11um	24h	https://maayanlab.cloud/L1000CDS2/meta?sig_id=LJP006_LNCAP_24H:BRD-K52911425:1.11
	38	0.0209	PERHEXILINE MALEATE	http://life.ccs.miami.edu/life/summary?mode=SmallMolecule&source=BROAD&input=BRD-A19633847	http://pubchem.ncbi.nlm.nih.gov/summary/summary.cgi?cid=5284439	None	HT29	10.0um	24.0h	https://maayanlab.cloud/L1000CDS2/meta?sig_id=CPC006_HT29_24H:BRD-A19633847:10.0
	39	0.0209	Tyrphostin AG 1478	http://life.ccs.miami.edu/life/summary?mode=SmallMolecule&source=BROAD&input=BRD-K68336408	http://pubchem.ncbi.nlm.nih.gov/summary/summary.cgi?cid=2051	None	HT29	56.78um	24.0h	https://maayanlab.cloud/L1000CDS2/meta?sig_id=CPC006_HT29_24H:BRD-K68336408:56.78
	40	0.0209	Dorsomorphin dihydrochloride	http://life.ccs.miami.edu/life/summary?mode=SmallMolecule&source=BROAD&input=BRD-K54233340	http://pubchem.ncbi.nlm.nih.gov/summary/summary.cgi?cid=11524144	None	MCF7	10.0um	24.0h	https://maayanlab.cloud/L1000CDS2/meta?sig_id=CPC006_MCF7_24H:BRD-K54233340:10.0
	41	0.0209	BRD-U33728988	http://life.ccs.miami.edu/life/summary?mode=SmallMolecule&source=BROAD&input=BRD-U33728988	None	None	SKB	10.0um	24.0h	https://maayanlab.cloud/L1000CDS2/meta?sig_id=CPC014_SKB_24H:BRD-U33728988:10.0
	42	0.0209	BRD-K91370081	http://life.ccs.miami.edu/life/summary?mode=SmallMolecule&source=BROAD&input=BRD-K91370081	http://pubchem.ncbi.nlm.nih.gov/summary/summary.cgi?cid=253602	None	HT29	10.0um	6.0h	https://maayanlab.cloud/L1000CDS2/meta?sig_id=CPC016_HT29_6H:BRD-K91370081:10.0
	43	0.0209	geldanamycin	http://life.ccs.miami.edu/life/summary?mode=SmallMolecule&source=BROAD&input=BRD-A19500257	http://pubchem.ncbi.nlm.nih.gov/summary/summary.cgi?cid=13017911	None	MCF7	10.0um	24.0h	https://maayanlab.cloud/L1000CDS2/meta?sig_id=CPC016_MCF7_24H:BRD-A19500257:10.0
	44	0.0209	BRD-A80502530	http://life.ccs.miami.edu/life/summary?mode=SmallMolecule&source=BROAD&input=BRD-A80502530	http://pubchem.ncbi.nlm.nih.gov/summary/summary.cgi?cid=23947601	None	MCF7	10.0um	24.0h	https://maayanlab.cloud/L1000CDS2/meta?sig_id=CPC017_MCF7_24H:BRD-A80502530:10.0
	45	0.0209	PHA-665752	http://life.ccs.miami.edu/life/summary?mode=SmallMolecule&source=BROAD&input=BRD-K95435023	http://pubchem.ncbi.nlm.nih.gov/summary/summary.cgi?cid=10461815	None	HT29	0.04um	24h	https://maayanlab.cloud/L1000CDS2/meta?sig_id=LJP005_HT29_24H:BRD-K95435023:0.04
	46	0.0209	vemurafenib	http://life.ccs.miami.edu/life/summary?mode=SmallMolecule&source=BROAD&input=BRD-K56343971	http://pubchem.ncbi.nlm.nih.gov/summary/summary.cgi?cid=42611257	None	HT29	10um	24h	https://maayanlab.cloud/L1000CDS2/meta?sig_id=LJP005_HT29_24H:BRD-K56343971:10
	47	0.0209	JW-7-24-1	http://life.ccs.miami.edu/life/summary?mode=SmallMolecule&source=BROAD&input=BRD-K57282030	http://pubchem.ncbi.nlm.nih.gov/summary/summary.cgi?cid=69923936	None	A549	10um	24h	https://maayanlab.cloud/L1000CDS2/meta?sig_id=LJP006_A549_24H:BRD-K57282030:10
	48	0.0204	wortmannin	http://life.ccs.miami.edu/life/summary?mode=SmallMolecule&source=BROAD&input=BRD-A75409952	http://pubchem.ncbi.nlm.nih.gov/summary/summary.cgi?cid=5691	None	PC3	10.0um	24.0h	https://maayanlab.cloud/L1000CDS2/meta?sig_id=CPC003_PC3_24H:BRD-A75409952:10.0
	49	0.0204	Tyrphostin AG 1478	http://life.ccs.miami.edu/life/summary?mode=SmallMolecule&source=BROAD&input=BRD-K68336408	http://pubchem.ncbi.nlm.nih.gov/summary/summary.cgi?cid=2051	None	A375	56.78um	24.0h	https://maayanlab.cloud/L1000CDS2/meta?sig_id=CPC006_A375_24H:BRD-K68336408:56.78
	50	0.0204	BRD-K92317137	http://life.ccs.miami.edu/life/summary?mode=SmallMolecule&source=BROAD&input=BRD-K92317137	http://pubchem.ncbi.nlm.nih.gov/summary/summary.cgi?cid=659101	None	PC3	10.0um	6.0h	https://maayanlab.cloud/L1000CDS2/meta?sig_id=CPC006_PC3_6H:BRD-K92317137:10.0
